# Supplementary material
Source: PubMed Central journal article supplement (PMC7377239)
Supplement: ehp7030.s001.acco.pdf [file ehp7030.s001.acco.pdf]

**Note to readers with disabilities:** *EHP* strives to ensure that all journal content is accessible to all readers. However, some figures and Supplemental Material published in *EHP* articles may not conform to [508 standards](#) due to the complexity of the information being presented. If you need assistance accessing journal content, please contact [ehp508@niehs.nih.gov](mailto:ehp508@niehs.nih.gov). Our staff will work with you to assess and meet your accessibility needs within 3 working days.

### **Supplemental Material**

#### **Cardiovascular Effects of Polychlorinated Biphenyls and Their Major Metabolites**

Fabian A. Grimm, William D. Klaren, Xueshu Li, Hans-Joachim Lehmler, Moumita Karmakar, Larry W. Robertson, Weihsueh A. Chiu, and Ivan Rusyn

#### **Table of Contents**

**Table S1.** Chemical names, abbreviations and references describing the synthesis and authentication of the PCB derivatives used in this study.

**Table S2.** Data files for all cell types and phenotypes used in this study (Supplemental Excel File).

**Text S1.** Purity determination by GC-MS.

**Text S2.** Enantiomeric purity determination.

**Figure S1.** Gas chromatogram and mass spectrum of 4-chlorobiphenyl (PCB 3).

**Figure S2.** Gas chromatogram and mass spectrum of 4-chlorobiphenyl-2'-ol (2'-OH PCB 3).

**Figure S3.** Gas chromatogram and mass spectrum of 4-chlorobiphenyl-3'-ol (3'-OH PCB 3).

**Figure S4.** Gas chromatogram and mass spectrum of 4-chlorobiphenyl-4'-ol (4'-OH PCB 3).

**Figure S5.** Gas chromatogram and mass spectrum of 4'-Methoxy-4-chlorobiphenyl (4'-OMe PCB 3).

**Figure S6.** Gas chromatogram and mass spectrum of 2-(4-chlorophenyl)benzo-2,5-quinone (4-Cl BQ).

**Figure S7.** Gas chromatogram and mass spectrum of 3,3'-dichlorobiphenyl (PCB 11).

**Figure S8.** Gas chromatogram and mass spectrum of 3,3'-dichlorobiphenyl-4-ol (4-OH PCB 11).

**Figure S9.** Gas chromatogram and mass spectrum of 3,3'-dichlorobiphenyl-5-ol (5-OH PCB 11).

**Figure S10.** Gas chromatogram and mass spectrum of 4-methoxy-3,3'-dichlorobiphenyl (4-OMe PCB 11).

**Figure S11.** Gas chromatogram and mass spectrum of Gas chromatogram and mass spectrum of 2,2',5,5'-tetrachlorobiphenyl (PCB 52).

**Figure S12.** Gas chromatogram and mass spectrum of 2,2',5,5'-tetrachlorobiphenyl-4-ol (4-OH PCB 52).

**Figure S13.** Gas chromatogram and mass spectrum of 4-methoxy-2,2',5,5'-tetrachlorobiphenyl (4-OMe PCB 52).

**Figure S14.** Gas chromatogram and mass spectrum of 2,2',3,5',6-pentachlorobiphenyl (PCB 95).

**Figure S15.** Gas chromatogram and mass spectrum of 3,3',4,4',5-pentachlorobiphenyl (PCB 126).

**Figure S16.** Gas chromatogram and mass spectrum of 2,2',4,4',5,5'-hexachlorobiphenyl (PCB 153).

**Figure S17.** Gas chromatogram and mass spectrum of (-)-2,2',3, 3',6,6'-hexachlorobiphenyl ((-)-PCB 136).

**Figure S18.** Gas chromatogram and mass spectrum of (+)-2,2',3, 3',6,6'-hexachlorobiphenyl ((+)-PCB 136).

**Figure S19.** Chromatogram of (-)-PCB 136 on enantioselective column.

**Figure S20.** Chromatogram of (+)-PCB 136 on enantioselective column.

## References

**Additional File-** Excel Document

**Table S1.** Chemical names, abbreviations and references describing the synthesis and authentication of the PCB derivatives used in this study.

| <b>Name</b>                                                                  | <b>Abbreviation</b> | <b>References</b>                                          |
|------------------------------------------------------------------------------|---------------------|------------------------------------------------------------|
| 4-Chlorobiphenyl                                                             | PCB 3               | (Espandiari et al. 2004)                                   |
| 3,3'-Dichlorobiphenyl                                                        | PCB 11              | (Holland et al. 2017; Sethi et al. 2019)                   |
| 2,2',5,5'-Tetrachlorobiphenyl                                                | PCB 52              | (Kania-Korwel et al. 2004)                                 |
| 2,2',3,5',6-Pentachlorobiphenyl                                              | PCB 95              | (Kania-Korwel et al. 2004)                                 |
| 3,3',4,4',5-Pentachlorobiphenyl                                              | PCB 126             | (Gadupudi et al. 2018)                                     |
| 2,2',4,4',5,5'-Hexachlorobiphenyl                                            | PCB 153             | (Kania-Korwel et al. 2004; Shaikh et al. 2006)             |
| (-)-2,2',3, 3',6,6'-Hexachlorobiphenyl                                       | (-)-PCB 136         | (Kania-Korwel et al. 2008)                                 |
| (+)-2,2',3,3',6,6'-Hexachlorobiphenyl                                        | (+)-PCB 136         | (Kania-Korwel et al. 2008)                                 |
| 4-Chlorobiphenyl-2'-ol                                                       | 2'-OH-PCB3          | (Dhakal et al. 2014)                                       |
| 4-Chlorobiphenyl-3'-ol                                                       | 3'-OH-PCB3          | (Dhakal et al. 2014)                                       |
| 4-Chlorobiphenyl-4'-ol                                                       | 4'-OH-PCB3          | (Dhakal et al. 2014)                                       |
| 3,3'-Dichlorobiphenyl-4-ol                                                   | 4-OH-PCB11          | (Alam et al. 2018)                                         |
| 3,3'-Dichlorobiphenyl-5-ol                                                   | 5-OH PCB 11         | (Joshi et al. 2011; Lehmler and Robertson 2001)            |
| 4-Chloro-2',5'-dihydroxybiphenyl                                             | 2',5'-diOH-PCB 3    | (McLean et al. 1996)                                       |
| 2,2',5,5'-Tetrachlorobiphenyl-4-ol                                           | 4-OH-PCB 52         | (Rodriguez et al. 2016)                                    |
| 4'-Methoxy-4-chlorobiphenyl                                                  | 4'-MeO-PCB 3        | (Joshi et al. 2011; Lehmler and Robertson 2001)            |
| 4-Methoxy-3,3'-dichlorobiphenyl                                              | 4-MeO-PCB 11        | (Joshi et al. 2011; Lehmler and Robertson 2001)            |
| 4-Methoxy-2,2',5,5'-tetrachlorobiphenyl                                      | 4-MeO-PCB 52        | (Rodriguez et al. 2016)                                    |
| 2-(4-Chlorophenyl)benzo-2,5-quinone                                          | 4-Cl-BQ             | (Song et al. 2008)                                         |
| Sulfuric acid mono-(4-chlorobiphenyl-2-yl) ester, ammonium salt              | 2-PCB 3 sulfate     | (Dhakal et al. 2014)                                       |
| Sulfuric acid mono-(4-chlorobiphenyl-3-yl) ester, ammonium salt              | 3-PCB 3 sulfate     | (Dhakal et al. 2014)                                       |
| Sulfuric acid mono-(4-chlorobiphenyl-2-yl) ester, ammonium salt              | 2'-PCB 3 sulfate    | (Dhakal et al. 2014)                                       |
| Sulfuric acid mono-(4-chlorobiphenyl-3'-yl) ester, ammonium salt             | 3'-PCB 3 sulfate    | (Li et al. 2010)                                           |
| Sulfuric acid mono-(4-chlorobiphenyl-4'-yl) ester, ammonium salt             | 4'-PCB 3 sulfate    | (Li et al. 2010)                                           |
| Sulfuric acid mono-(3,3'-dichlorobiphenyl-4-yl) ester, ammonium salt         | 4-PCB 11 sulfate    | (Li et al. 2010; Rodriguez et al. 2016; Sethi et al. 2019) |
| Sulfuric acid mono-(2,2',5,5'-tetrachlorobiphenyl-4-yl) ester, ammonium salt | 4-PCB 52 sulfate    | (Li et al. 2010; Rodriguez et al. 2016)                    |

**Table S2. Data files for all cell types and phenotypes used in this study (Supplemental Excel File)**

Sheet "Read\_me\_abbreviations" – all acronyms used in the data files

Sheet "iPSC-CM" – data for iCell cardiomyocytes

Sheet "iPSC-EC" – data for iCell endothelial cells

Sheet "HUVECs" – data for HUVECs

Sheet "POD\_summary" – POD data for all cell types and phenotypes

Sheet "ToxPi\_summary" – ToxPi data for all cell types and phenotypes

Sheet "ToxPi Slice Distribution" – Explanation for all slice abbreviations and which data were included in which slice in Figure 4

Sheet "ToxPi Scores" – ToxPi scores for each comparison shown in Figure 4

### **Supplemental Text 1. Purity determination by GC-MS**

All PCBs, hydroxylated PCBs, methoxylated PCBs, and the PCB quinone were analyzed on an Agilent 7890A gas chromatography equipped with an Agilent 5975 Inert Mass Selective Detector (Agilent Technologies, CA, USA) operated in electronic ionization mode on a SLB-5MS capillary column (30 m length, 250  $\mu\text{m}$  inner diameter, 0.25  $\mu\text{m}$  film thickness; Supelco, Bellefonte, PA, USA). The temperature program was as described previously (Li et al. 2018). Briefly, the oven temperature started at 50  $^{\circ}\text{C}$ , 10  $^{\circ}\text{C}/\text{min}$  to 150  $^{\circ}\text{C}$ , then 5  $^{\circ}\text{C}/\text{min}$  to 280  $^{\circ}\text{C}$ , hold for 6 min, and then 10  $^{\circ}\text{C}/\text{min}$  to 300  $^{\circ}\text{C}$ , hold for 10 min. Helium was used as carrier gas with a constant flow rate of 1.5 mL/min. The injector temperature was 280  $^{\circ}\text{C}$ . The temperatures of transfer line, source and quadrupole were 280  $^{\circ}\text{C}$ , 230  $^{\circ}\text{C}$  and 150  $^{\circ}\text{C}$ , respectively.

### **Supplemental Text 2. Enantiomeric purity determination**

The purity of the enantiomeric pure PCB 136 was performed on an Agilent 7890A gas chromatography with a  $^{63}\text{Ni}$ - $\mu\text{ECD}$  detector and a Chiralsil-Dex (CD column, 25 m length, 250  $\mu\text{m}$  inner diameter, 0.25  $\mu\text{m}$  film thickness; Varian, Palo Alto, CA, USA). The temperature program was based on a previously published method (Wu et al. 2013) with minor modification: starting at 50  $^{\circ}\text{C}$ , then 10  $^{\circ}\text{C}/\text{min}$  to 155  $^{\circ}\text{C}$ , hold for 90 min, 20  $^{\circ}\text{C}/\text{min}$  to 200  $^{\circ}\text{C}$ , hold for 20 min. The temperatures of the injector and detector were 250  $^{\circ}\text{C}$  and 300  $^{\circ}\text{C}$ , respectively. Helium was used as carrier gas with a constant flow rate of 3 mL/min. Argon 95%-methane 5% was used as makeup gas with a constant flow rate of 60 mL/min.

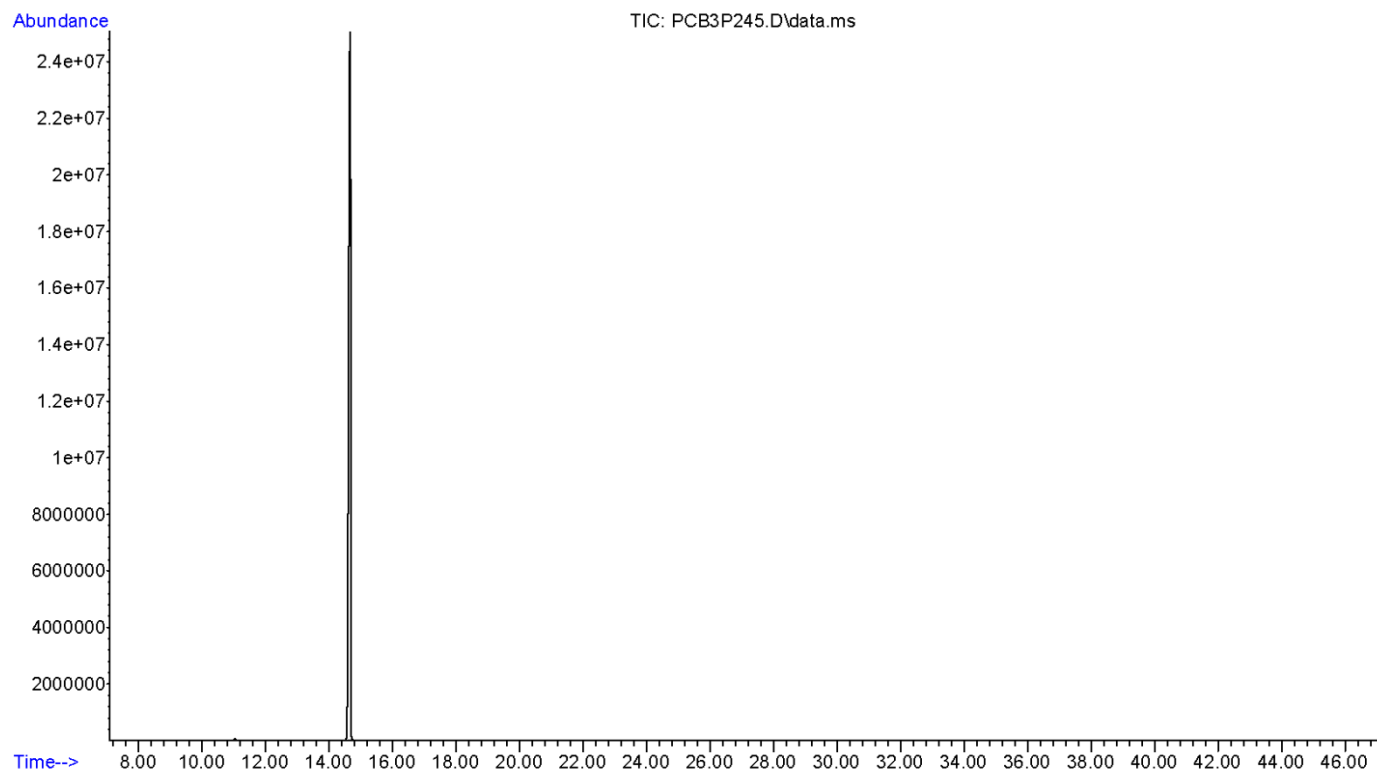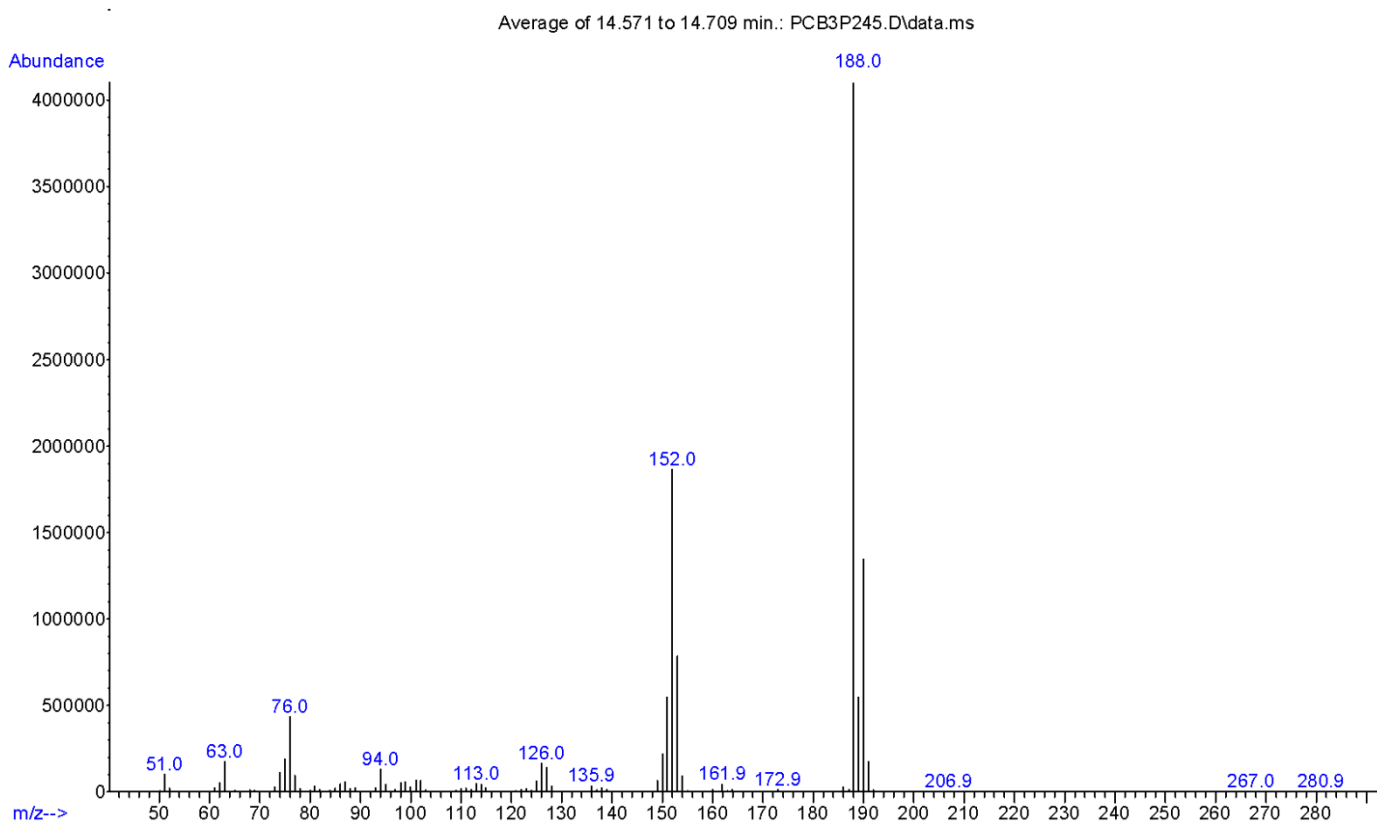

**Fig. S1.** Gas chromatogram and mass spectrum of 4-chlorobiphenyl (PCB 3).

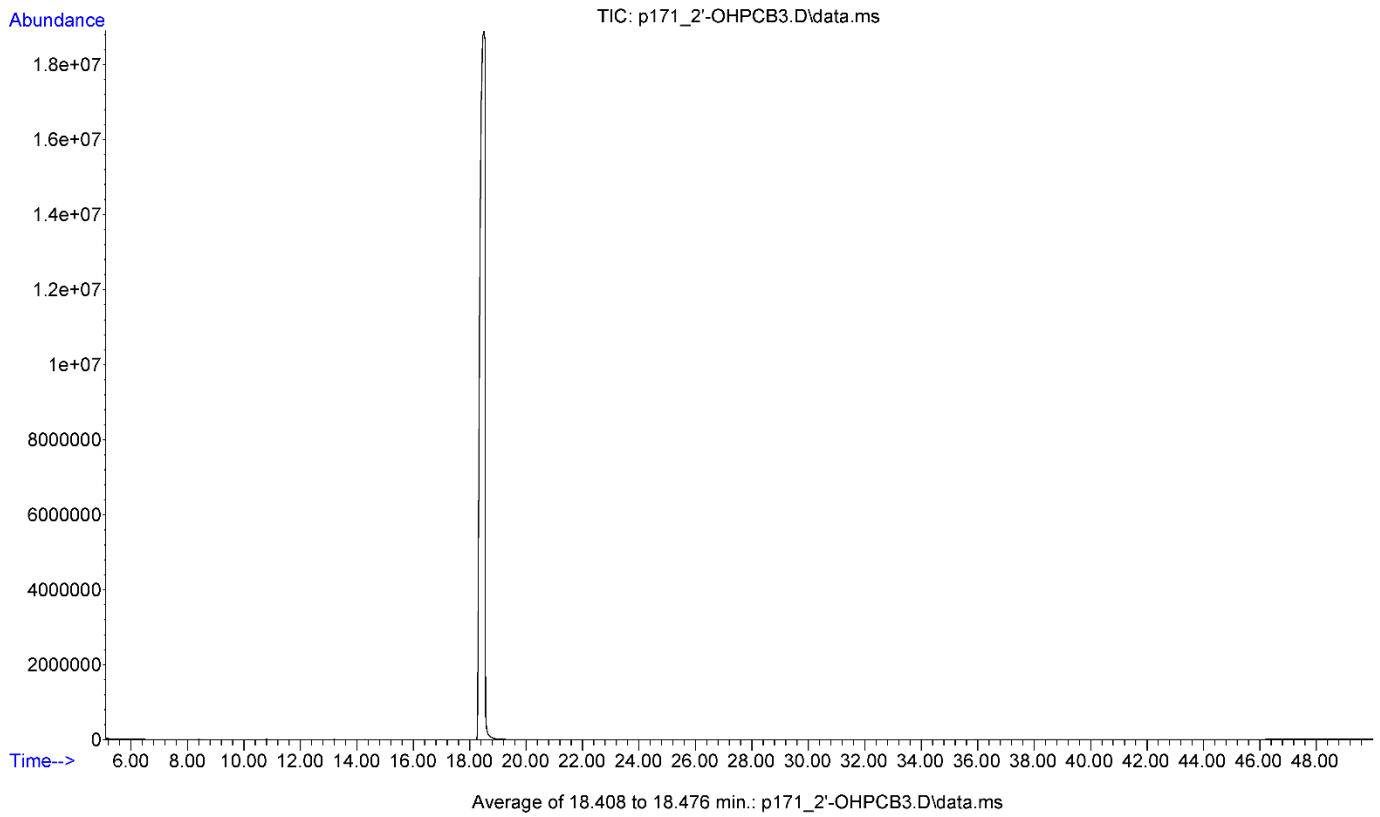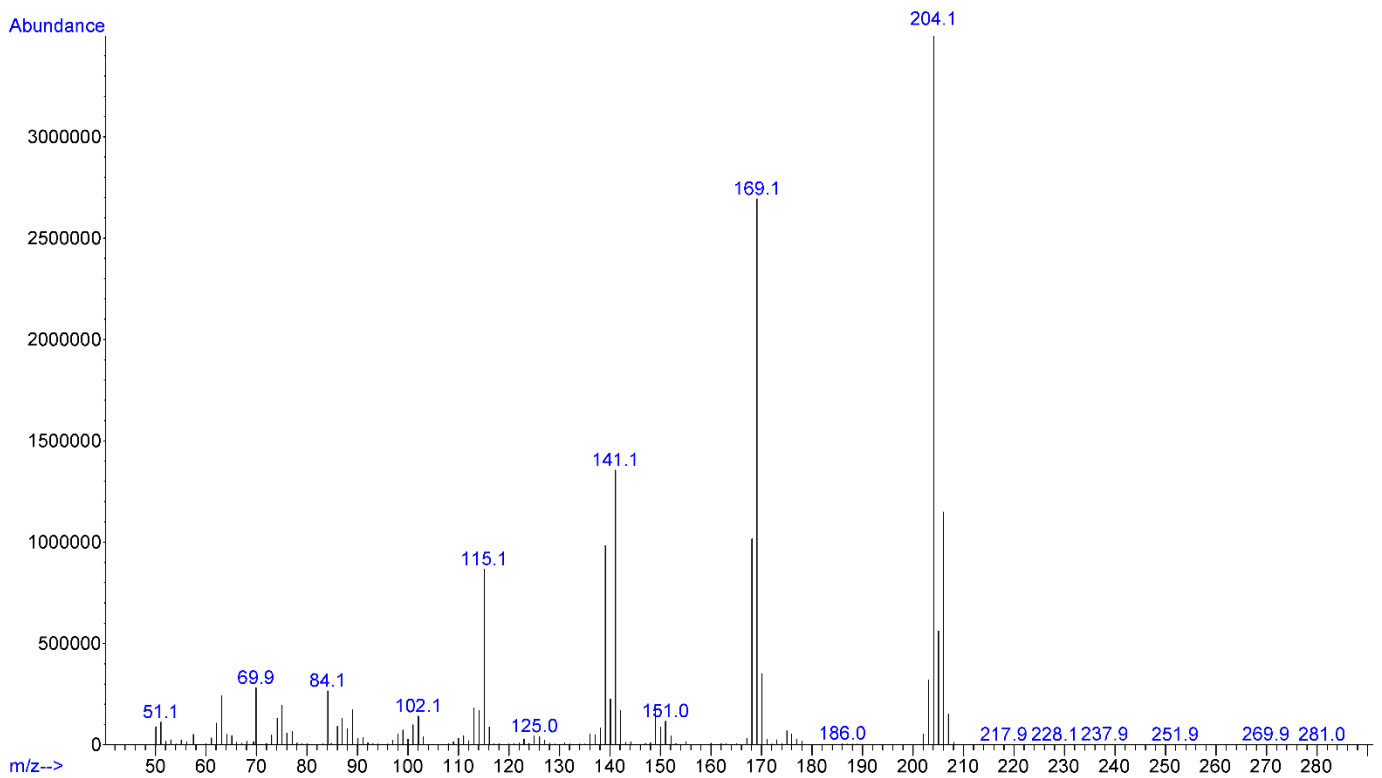

**Fig. S2.** Gas chromatogram and mass spectrum of 4-chlorobiphenyl-2'-ol (2'-OH PCB 3).

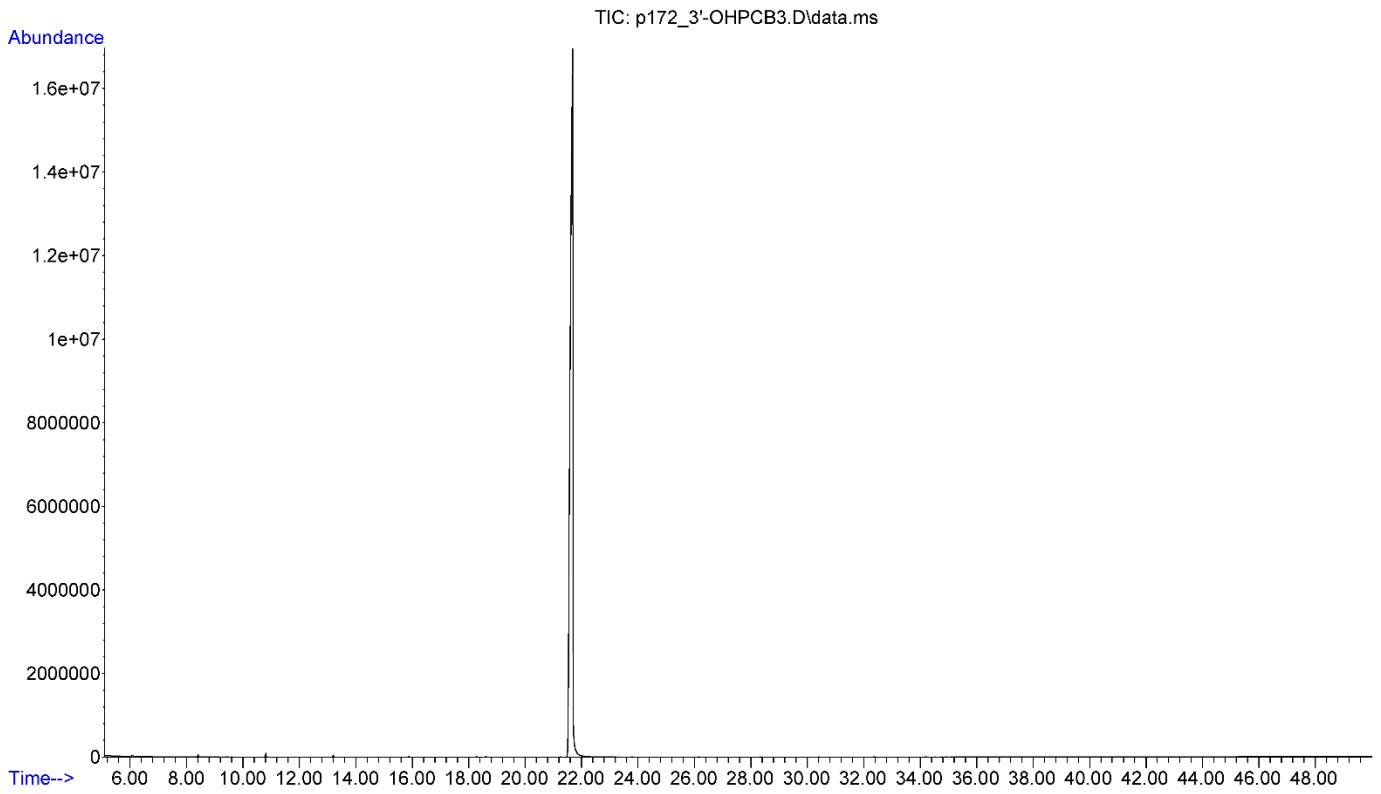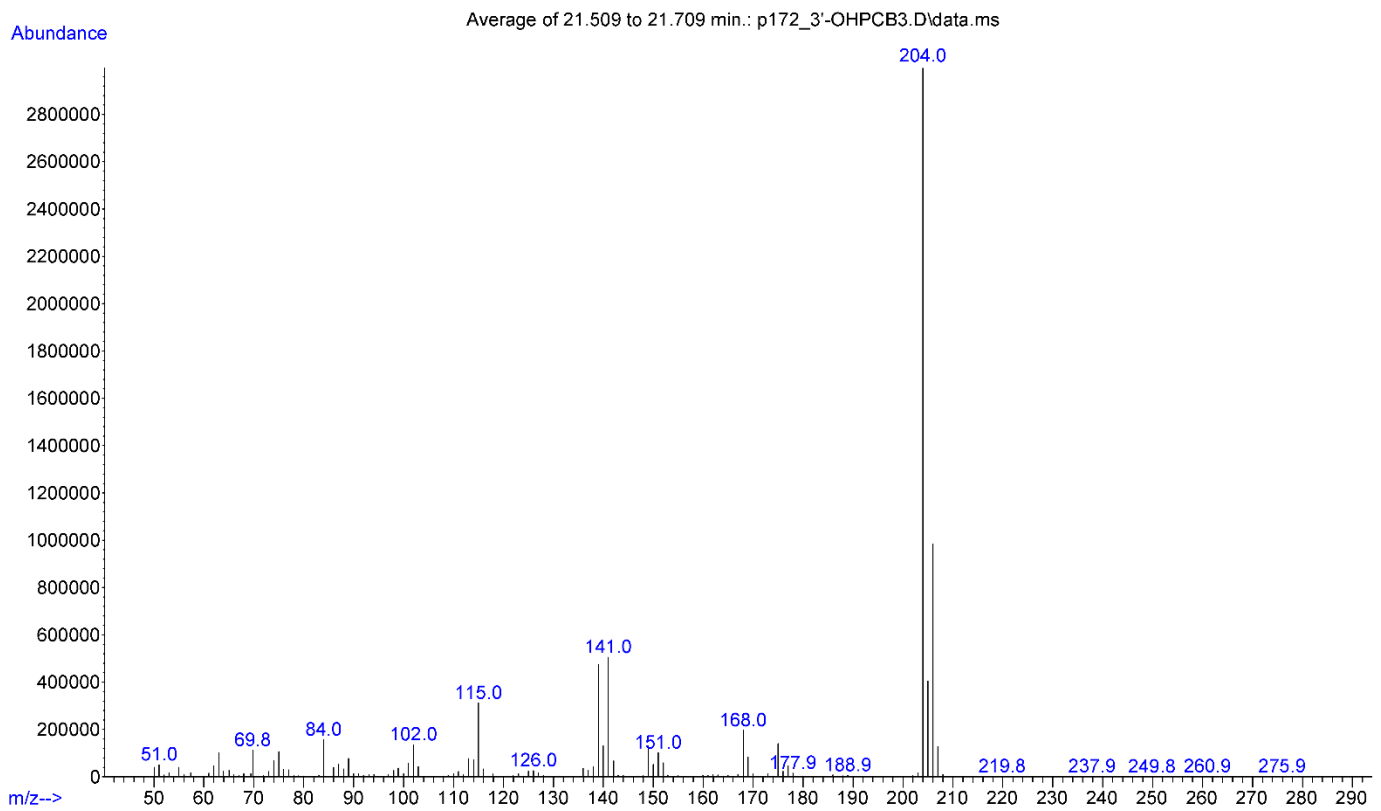

**Fig. S3.** Gas chromatogram and mass spectrum of 4-chlorobiphenyl-3'-ol (3'-OH PCB 3).



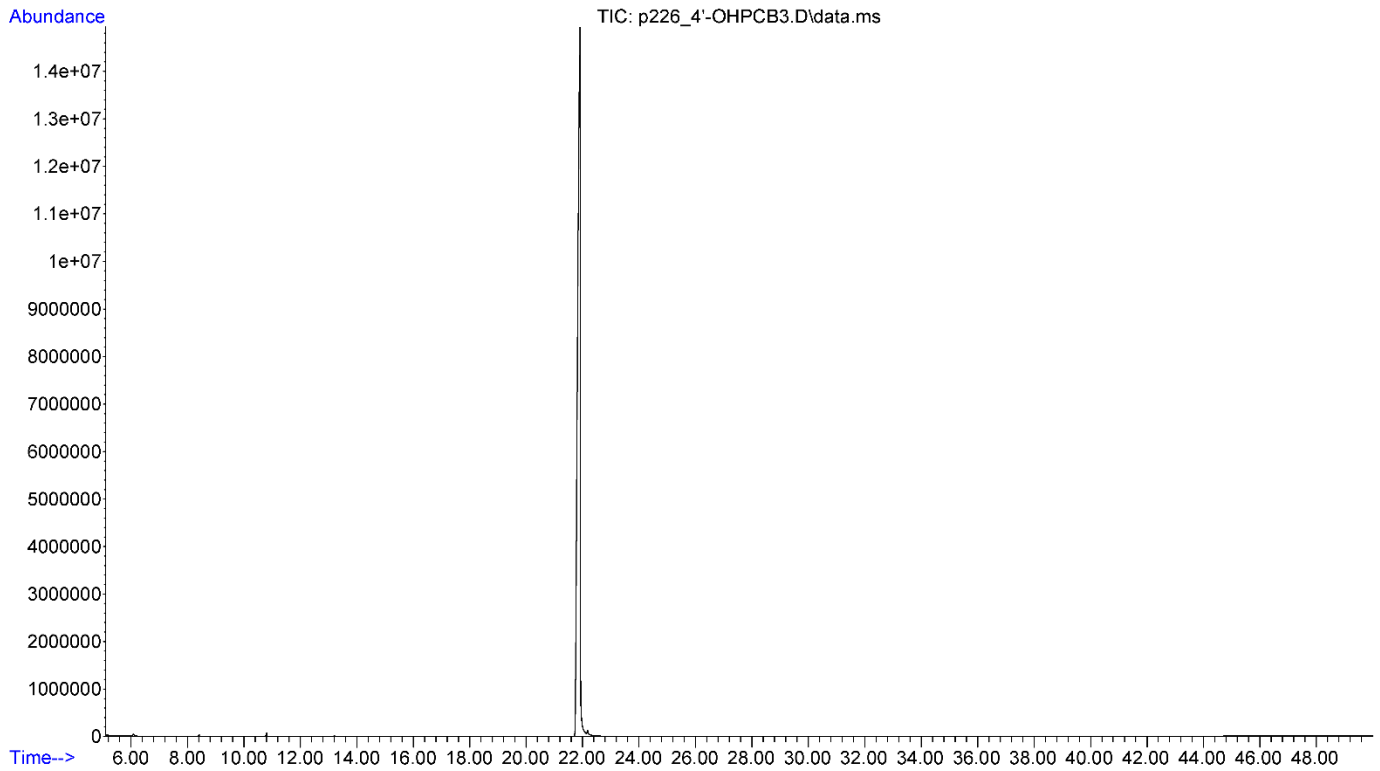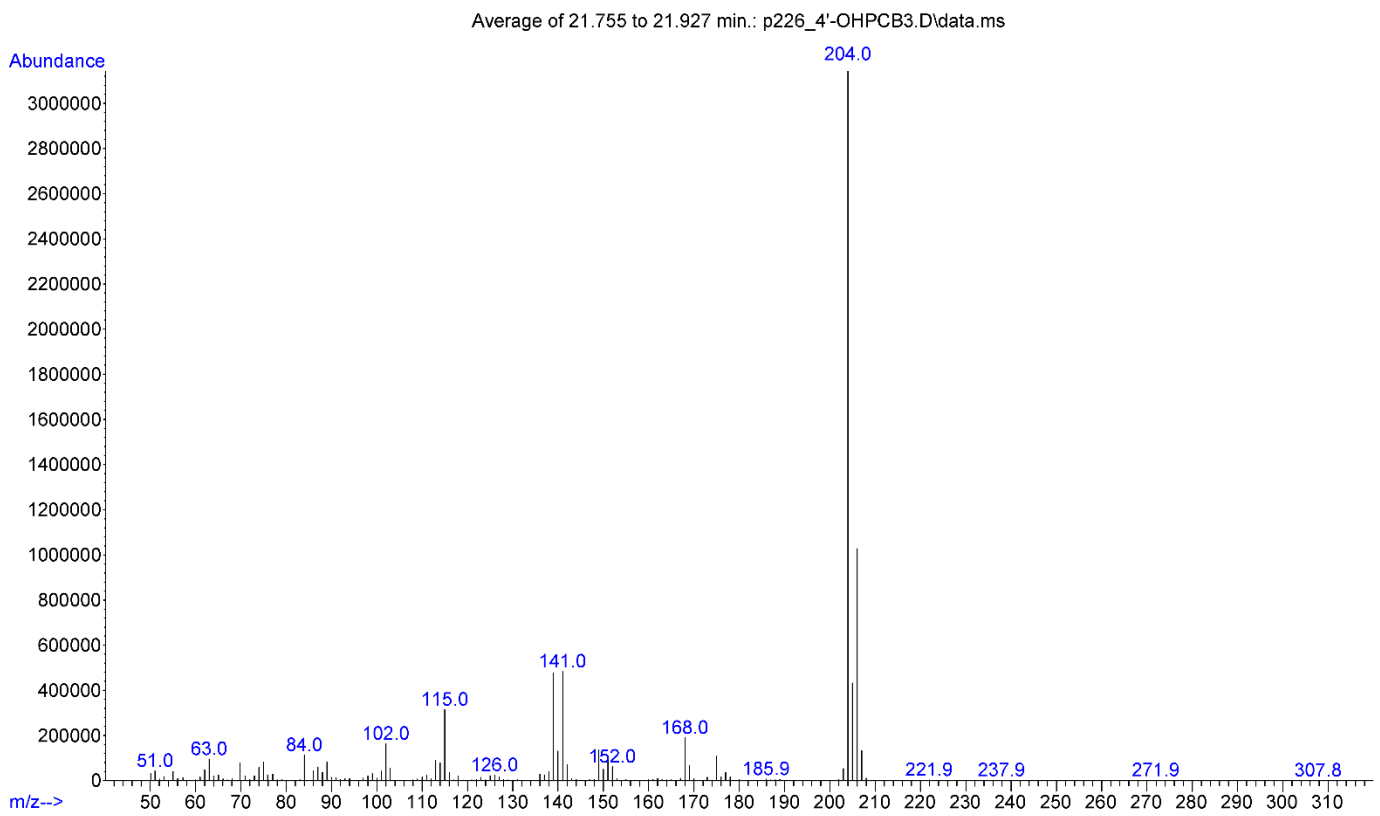

Fig. S4. Gas chromatogram and mass spectrum of 4-chlorobiphenyl-4'-ol (4'-OH PCB 3).

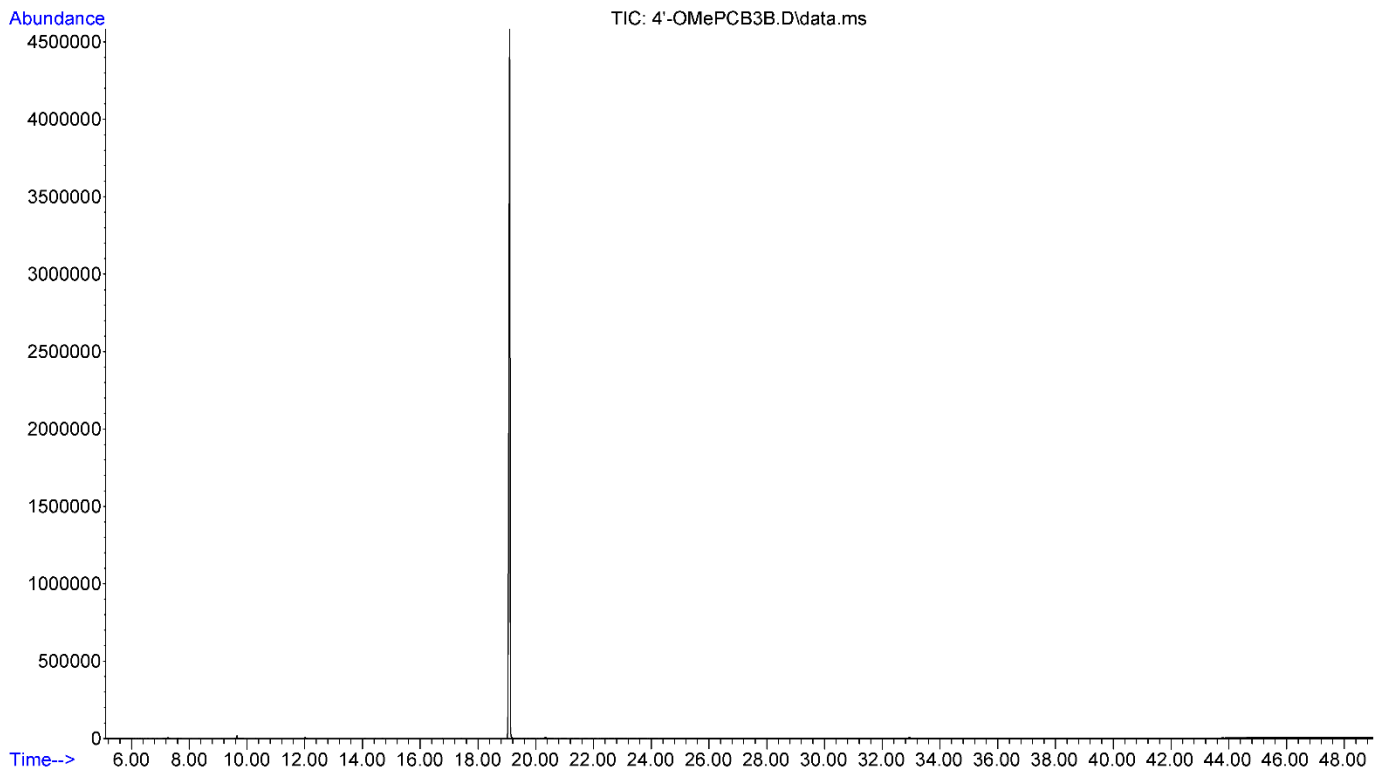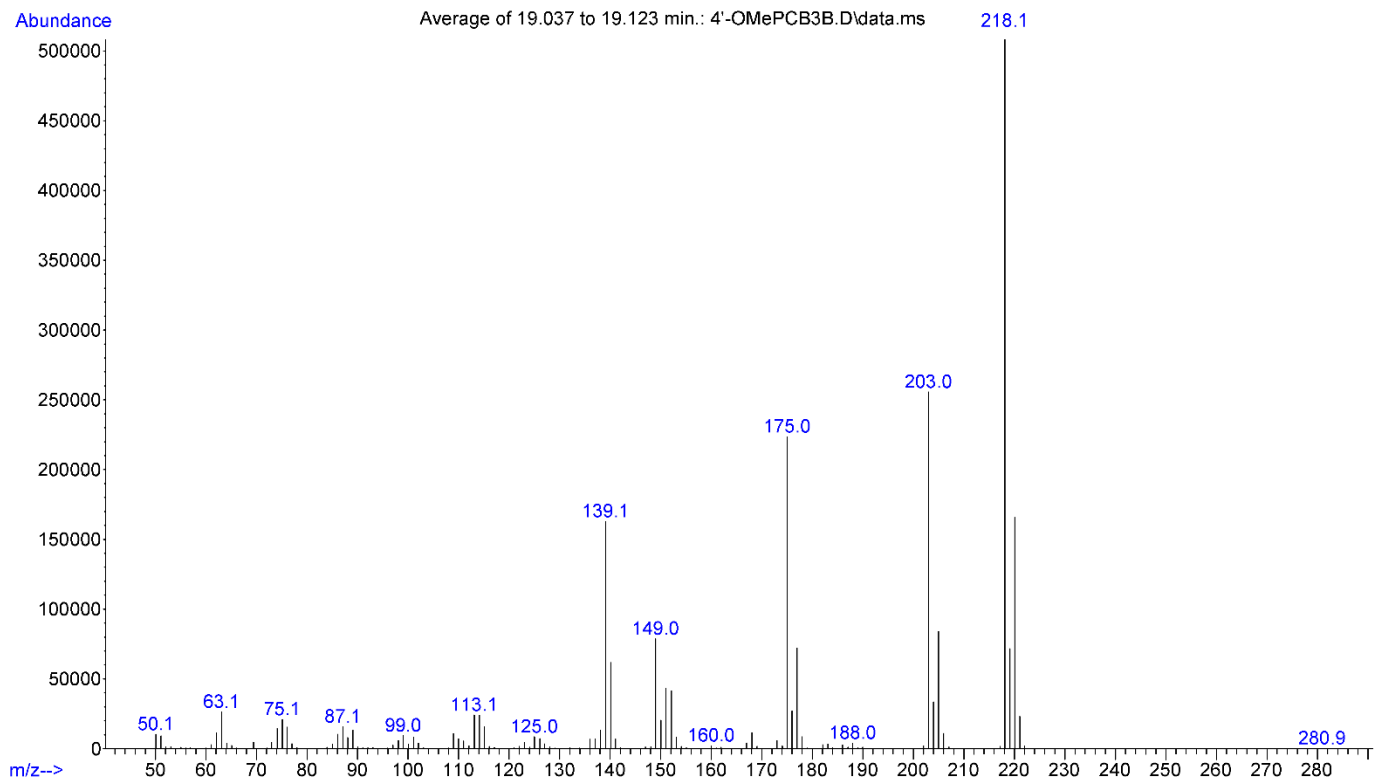

**Fig. S5.** Gas chromatogram and mass spectrum of 4'-Methoxy-4-chlorobiphenyl (4'-OMe PCB 3).

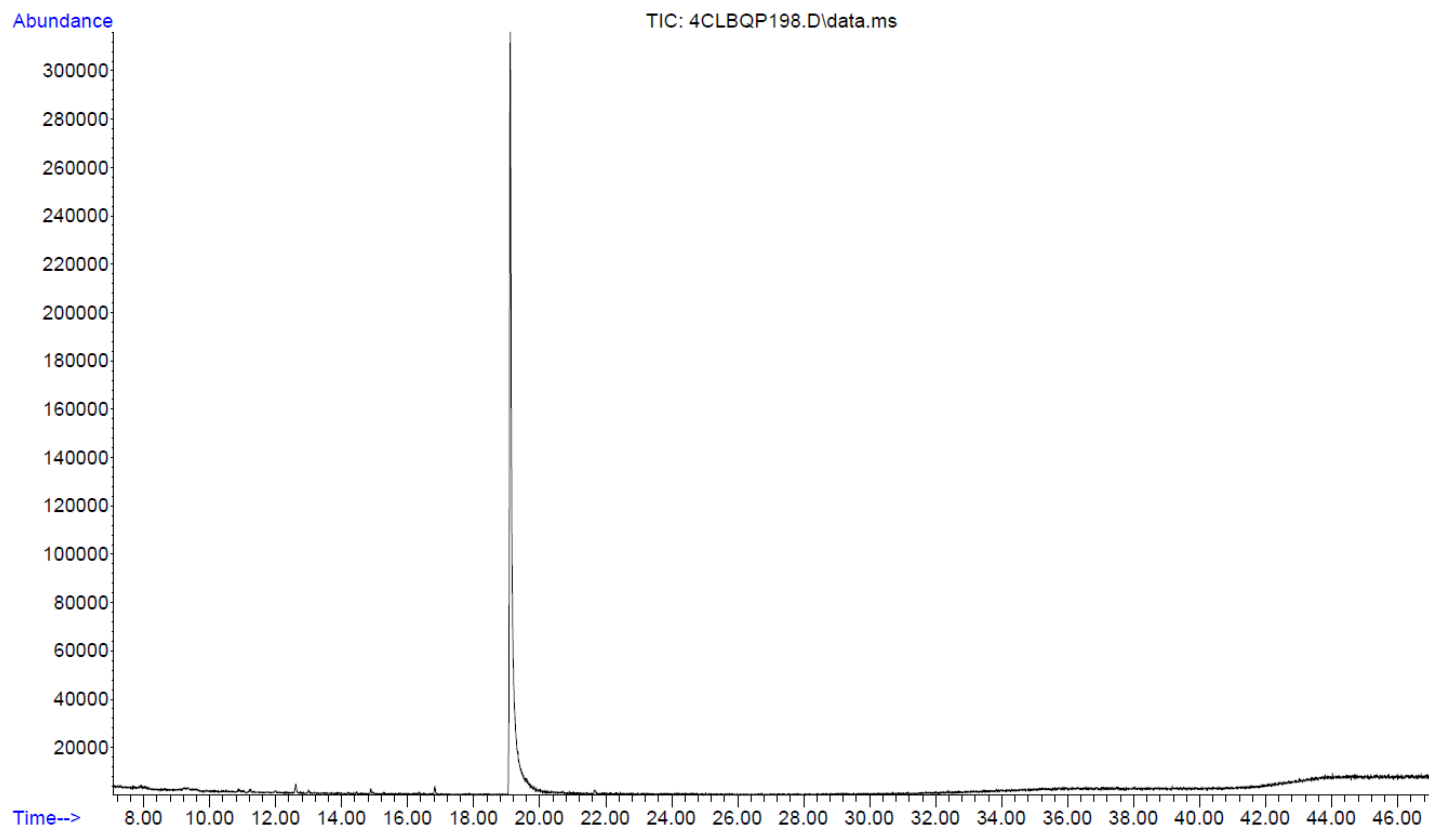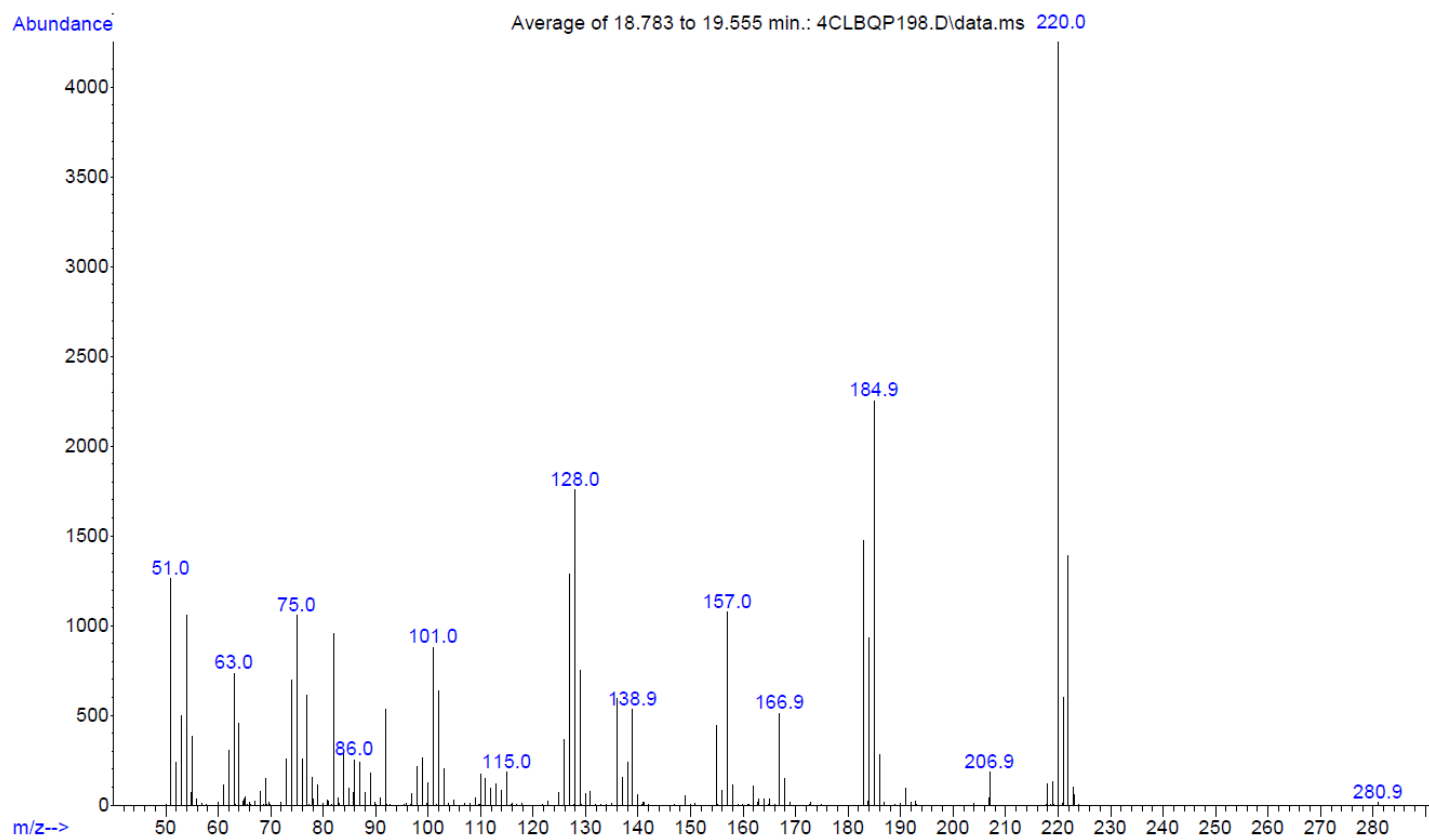

**Fig. S6.** Gas chromatogram and mass spectrum of 2-(4-chlorophenyl)benzo-2,5-quinone (4-Cl BQ).

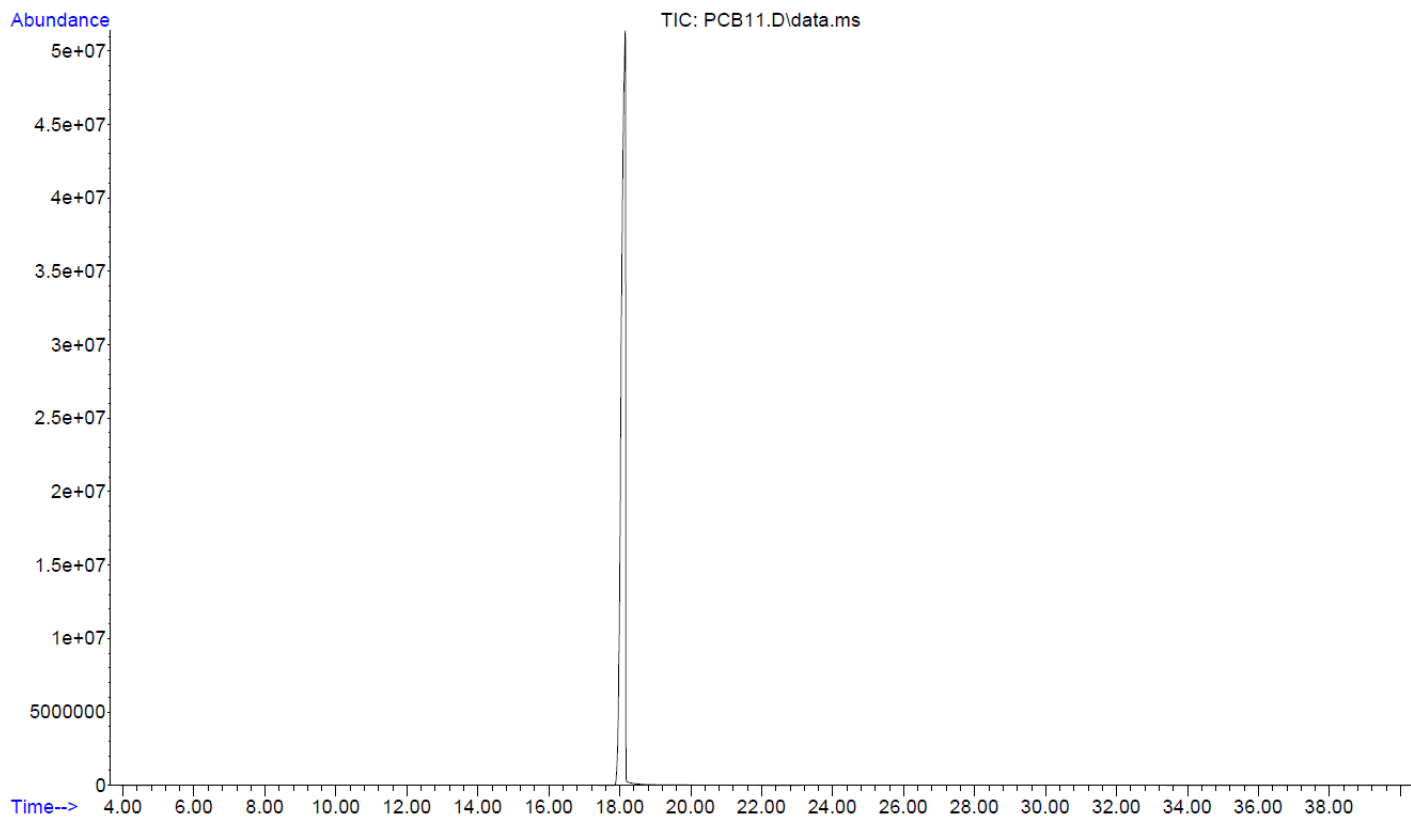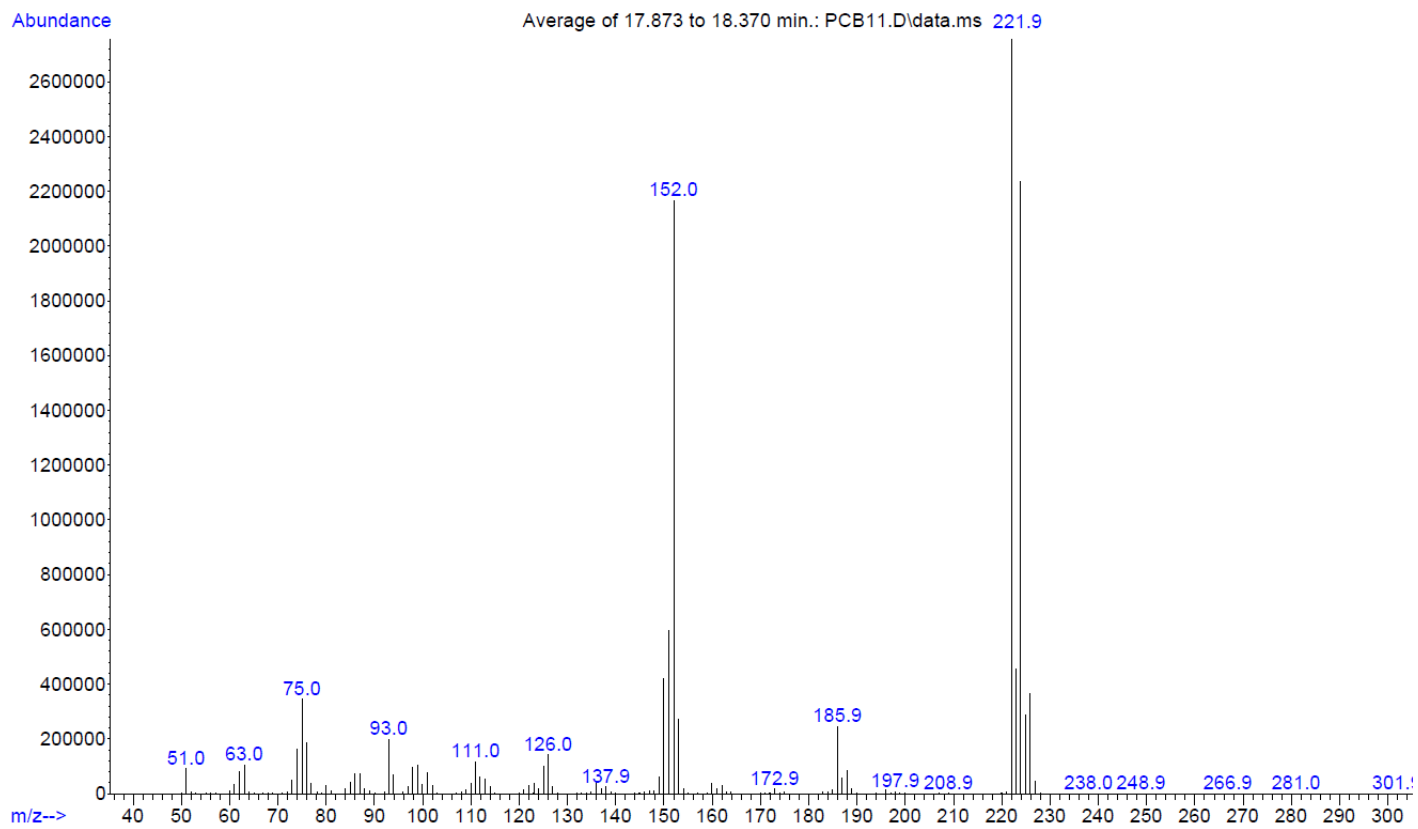

**Fig. S7.** Gas chromatogram and mass spectrum of 3,3'-dichlorobiphenyl (PCB 11).

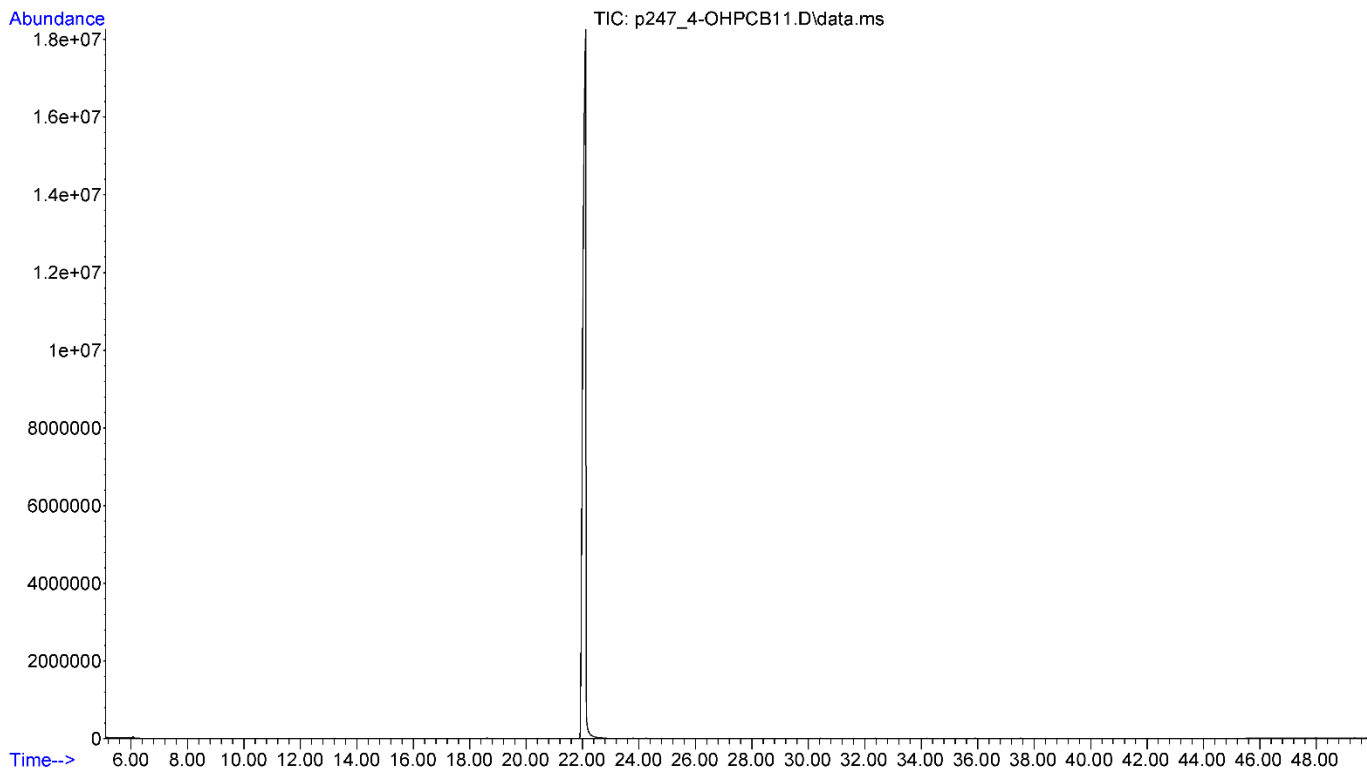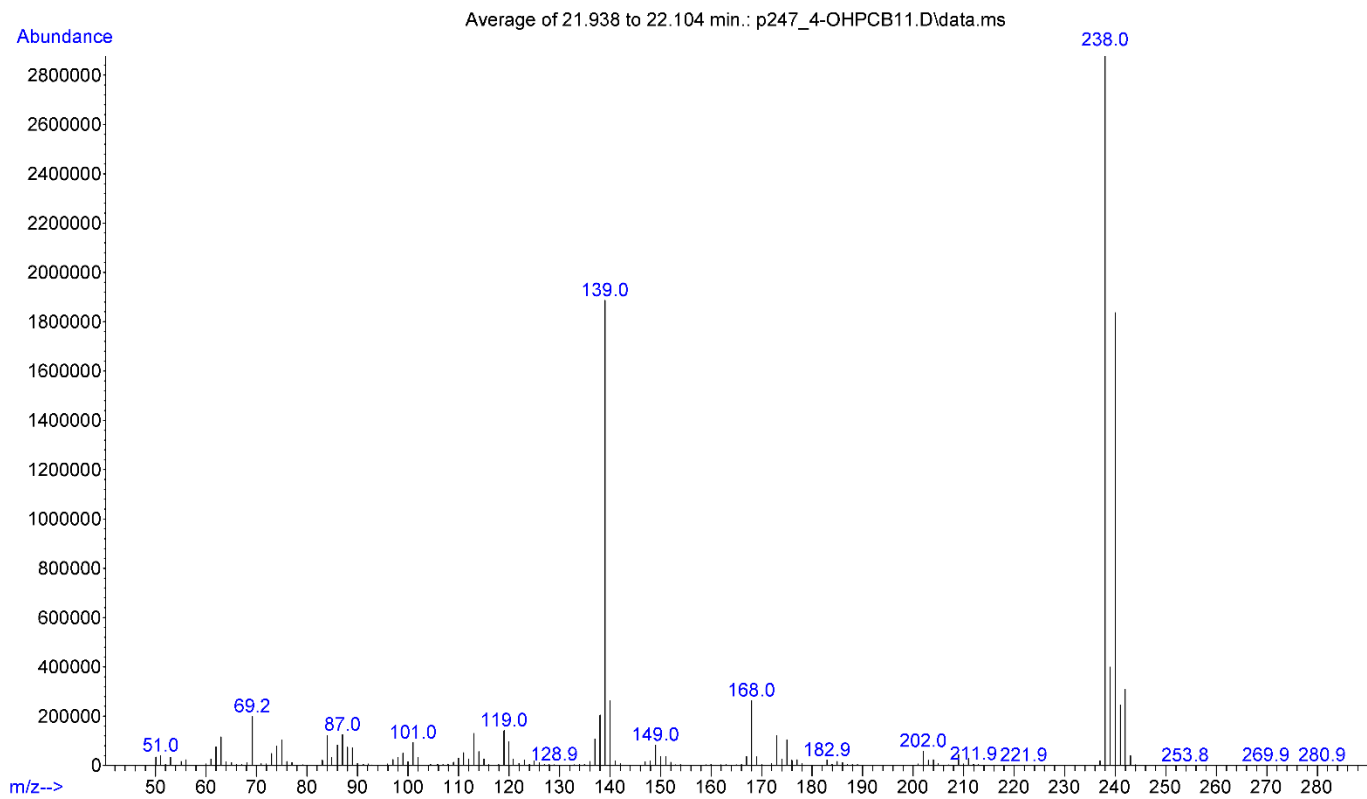

**Fig. S8.** Gas chromatogram and mass spectrum of 3,3'-dichlorobiphenyl-4-ol (4-OH PCB 11).

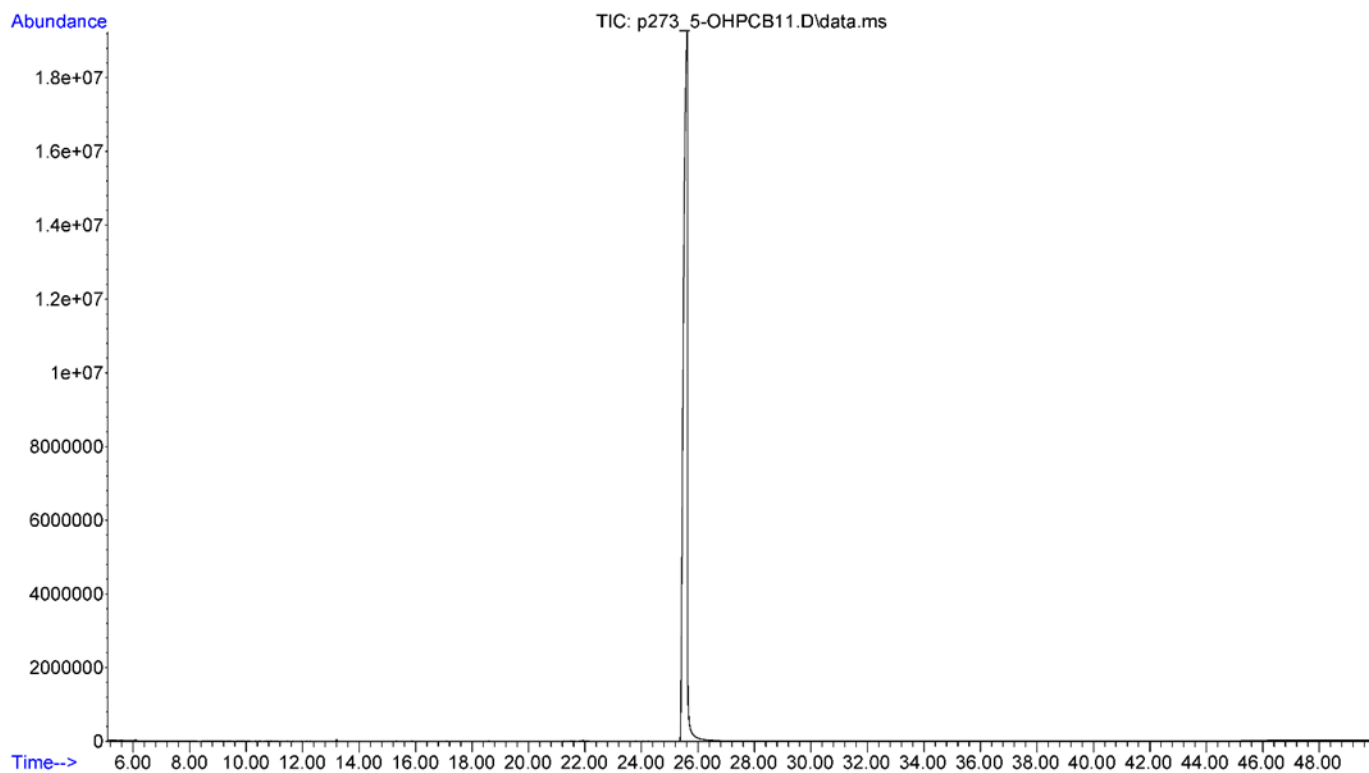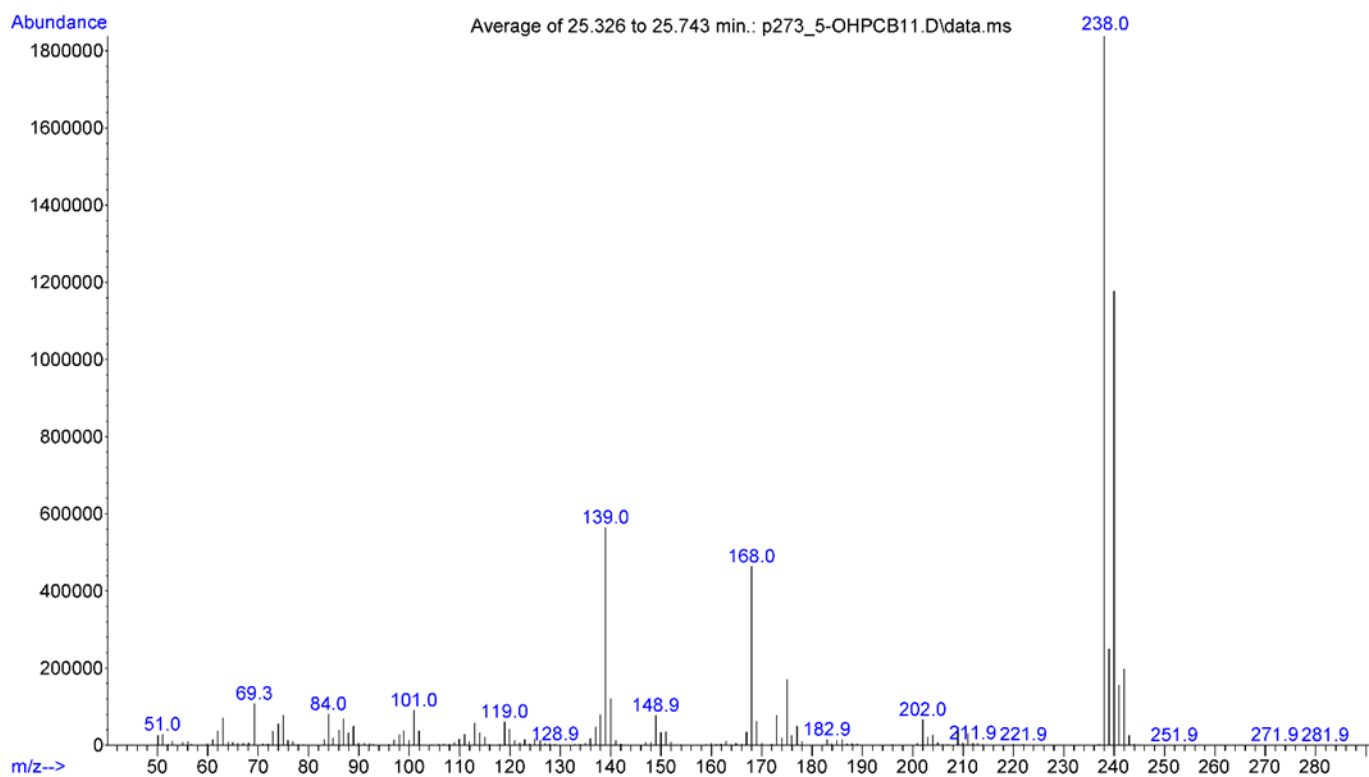

**Fig. S9** Gas chromatogram and mass spectrum of 3,3'-dichlorobiphenyl-5-ol (5-OH PCB 11)

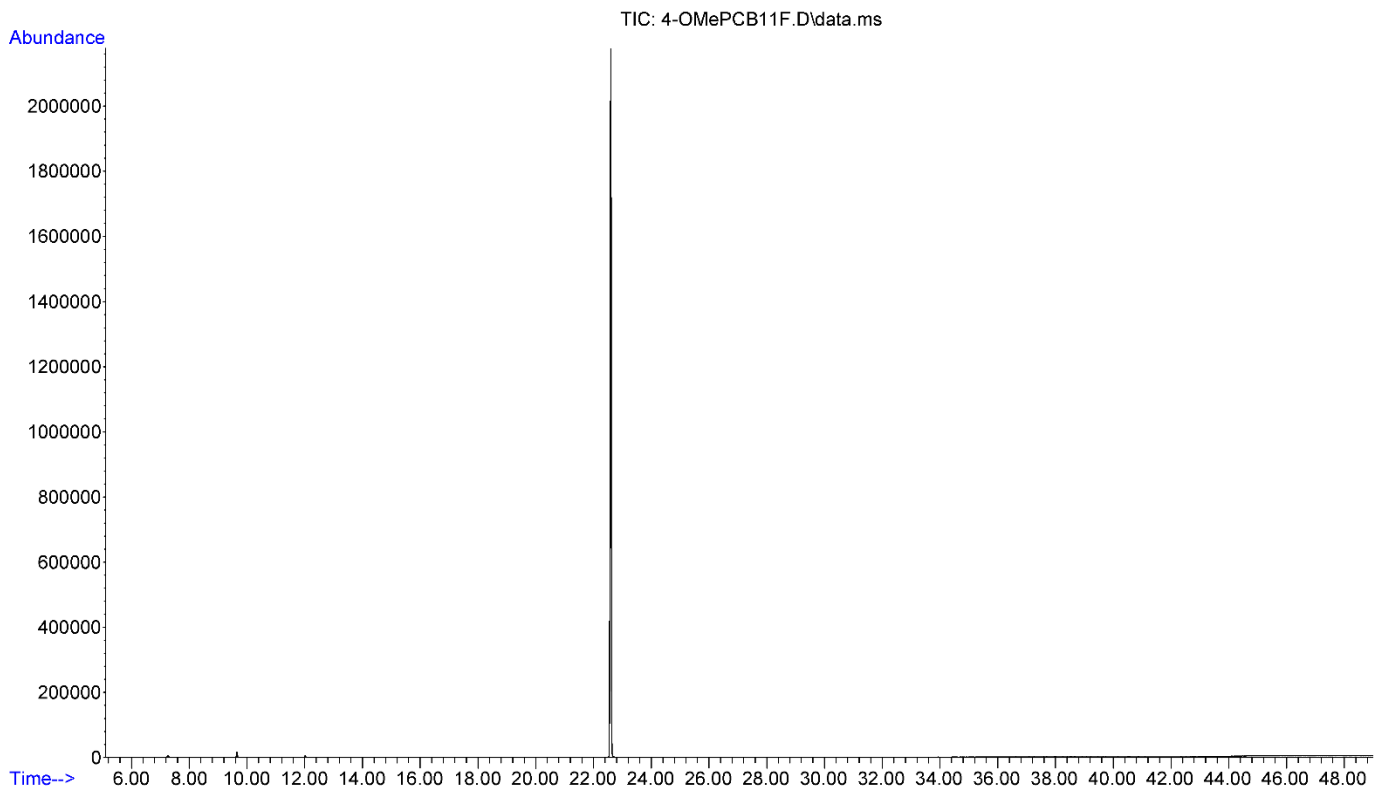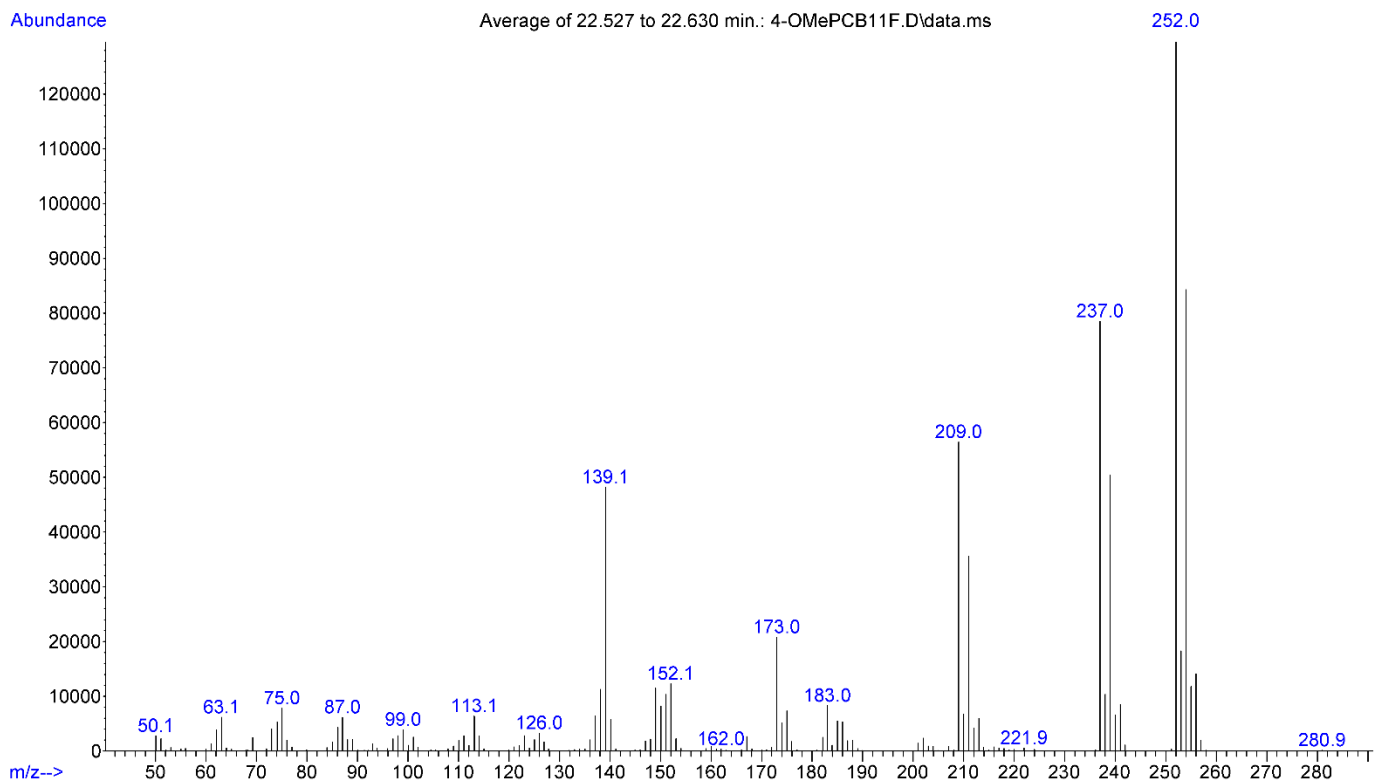

**Fig. S10.** Gas chromatogram and mass spectrum of 4-methoxy-3,3'-dichlorobiphenyl (4-OMe PCB 11).

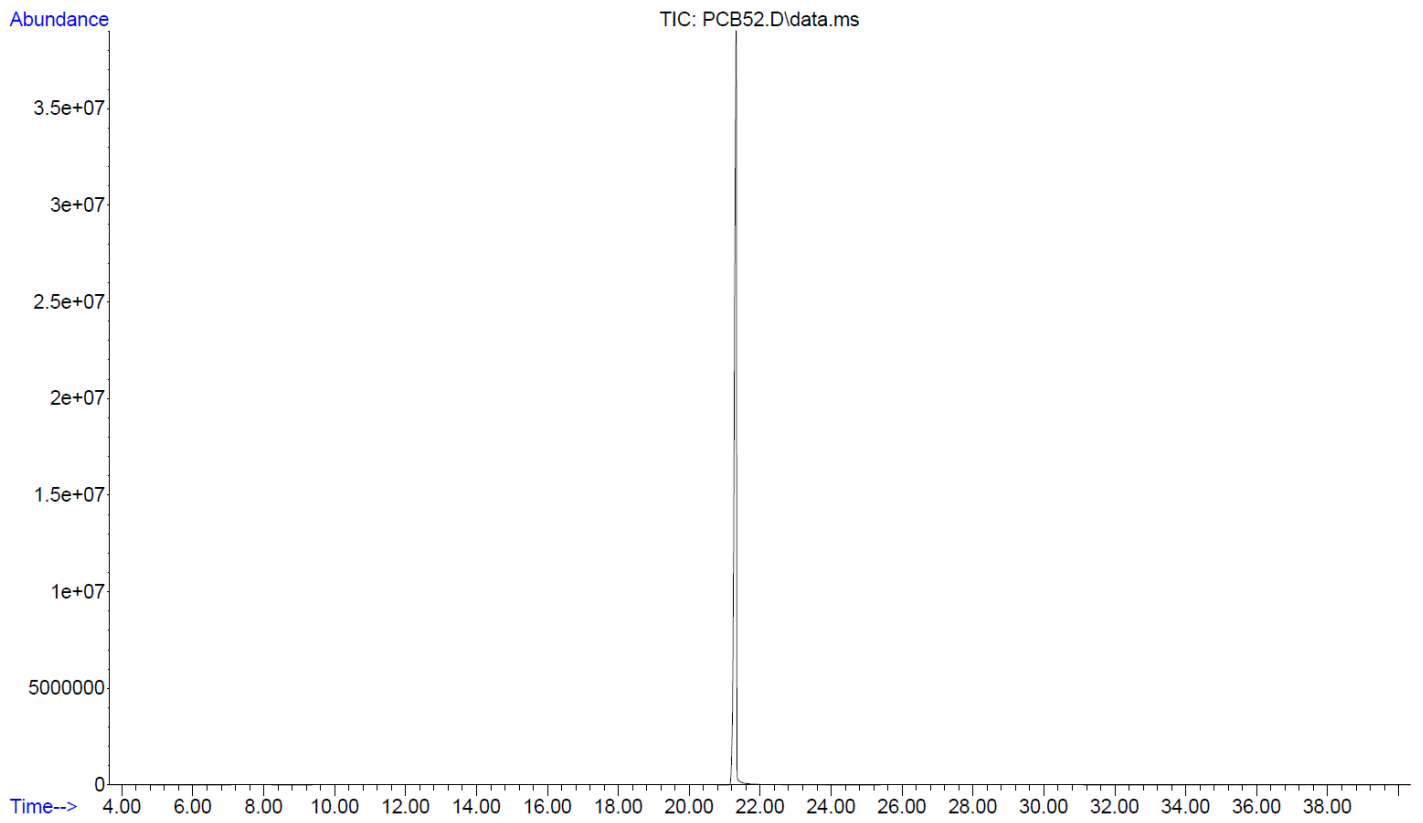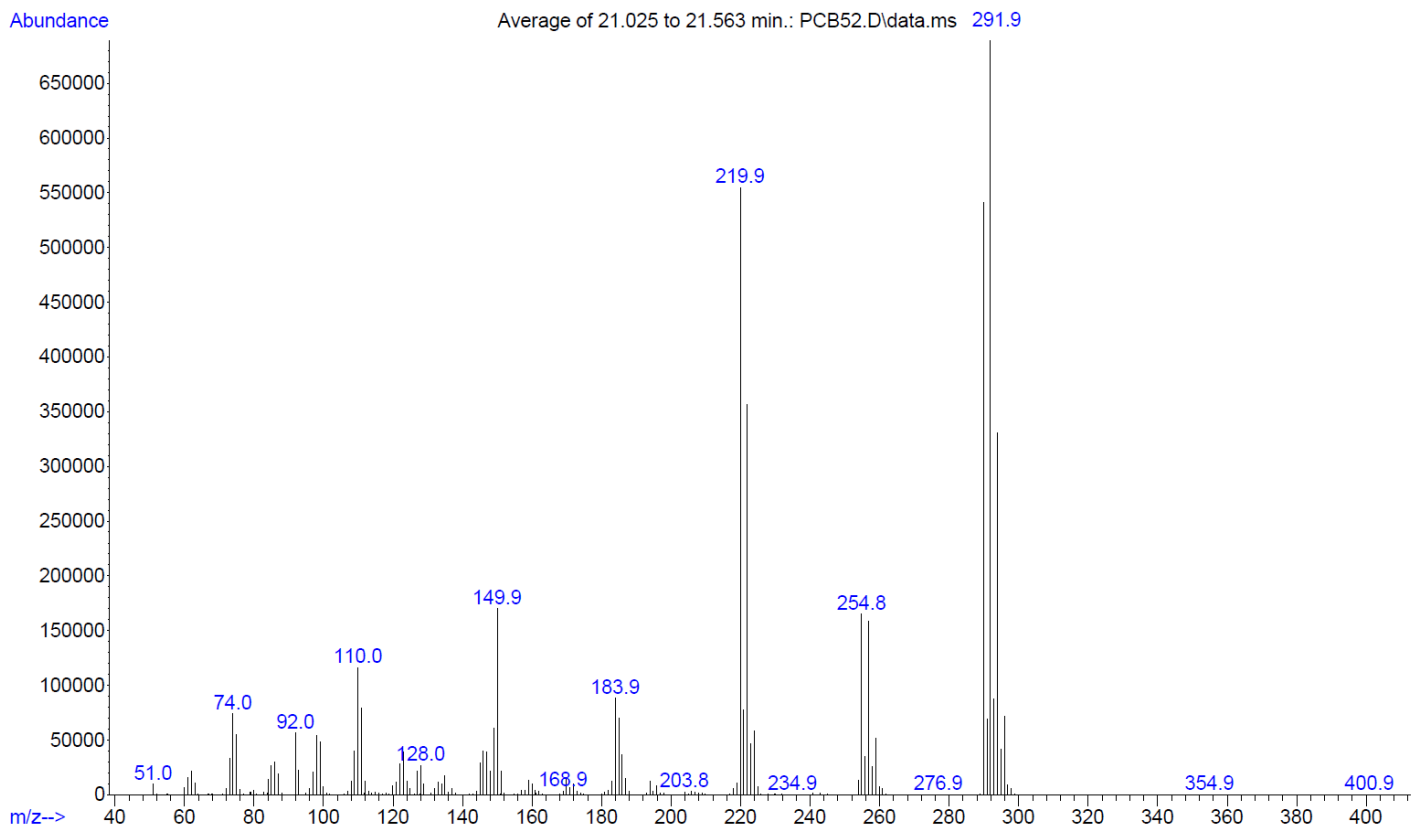

**Fig. S11.** Gas chromatogram and mass spectrum of Gas chromatogram and mass spectrum of 2,2',5,5'-tetrachlorbiphenyl (PCB 52).



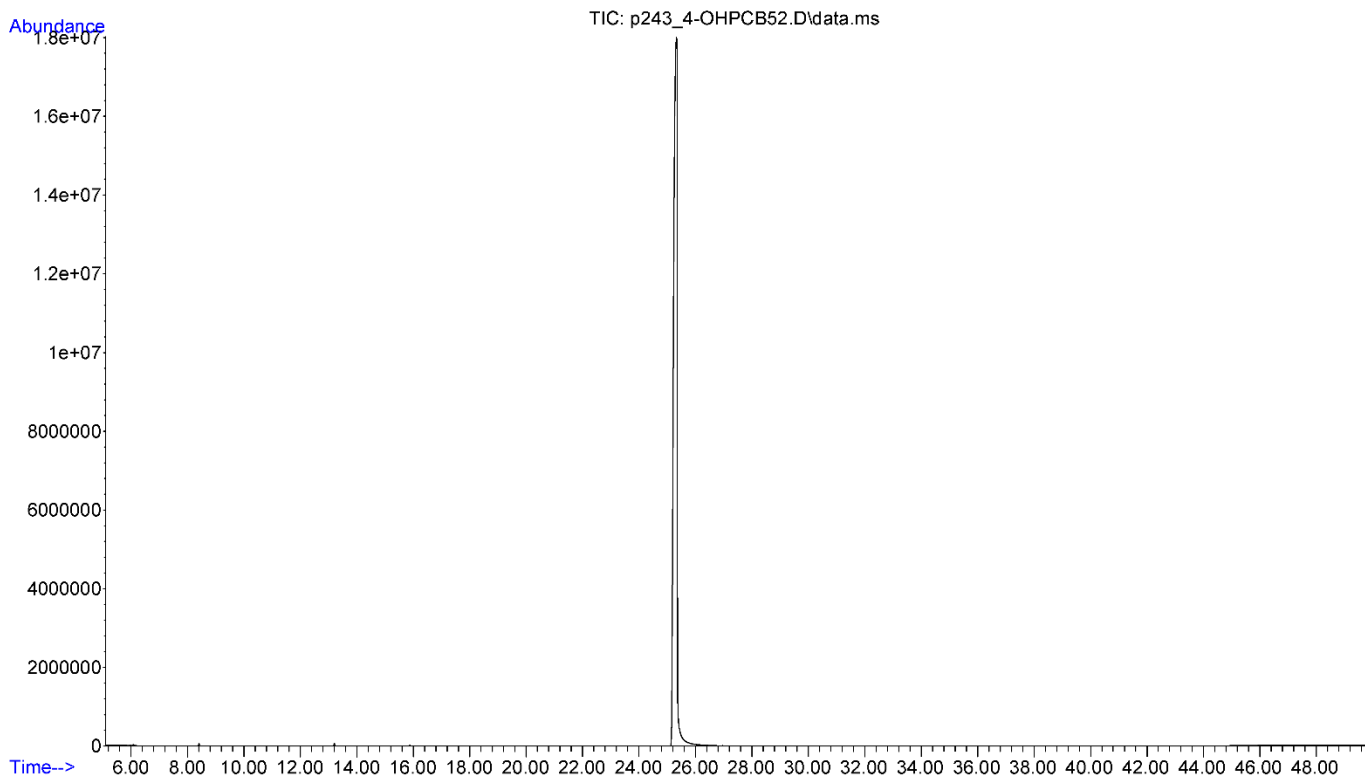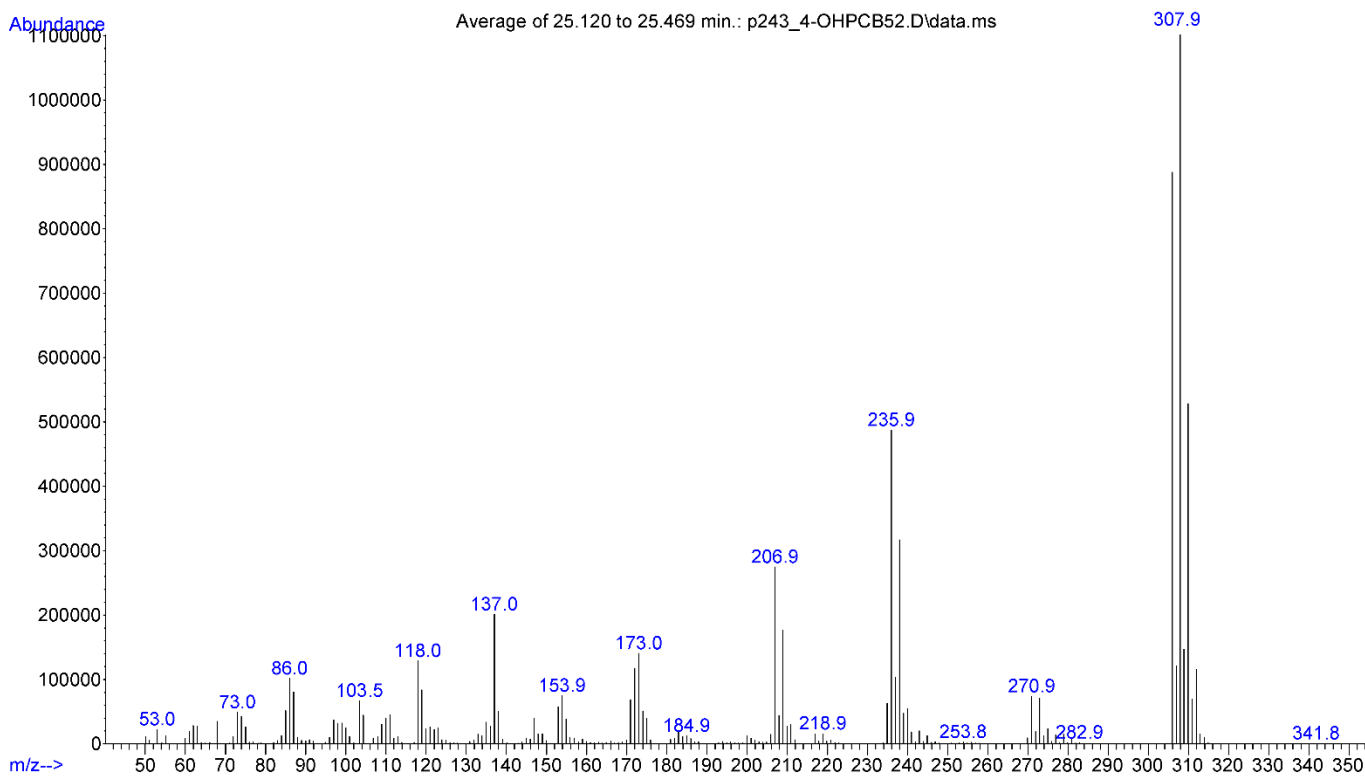

**Fig. S12.** Gas chromatogram and mass spectrum of 2,2',5,5'-tetrachlorbiphenyl-4-ol (4-OH PCB 52).

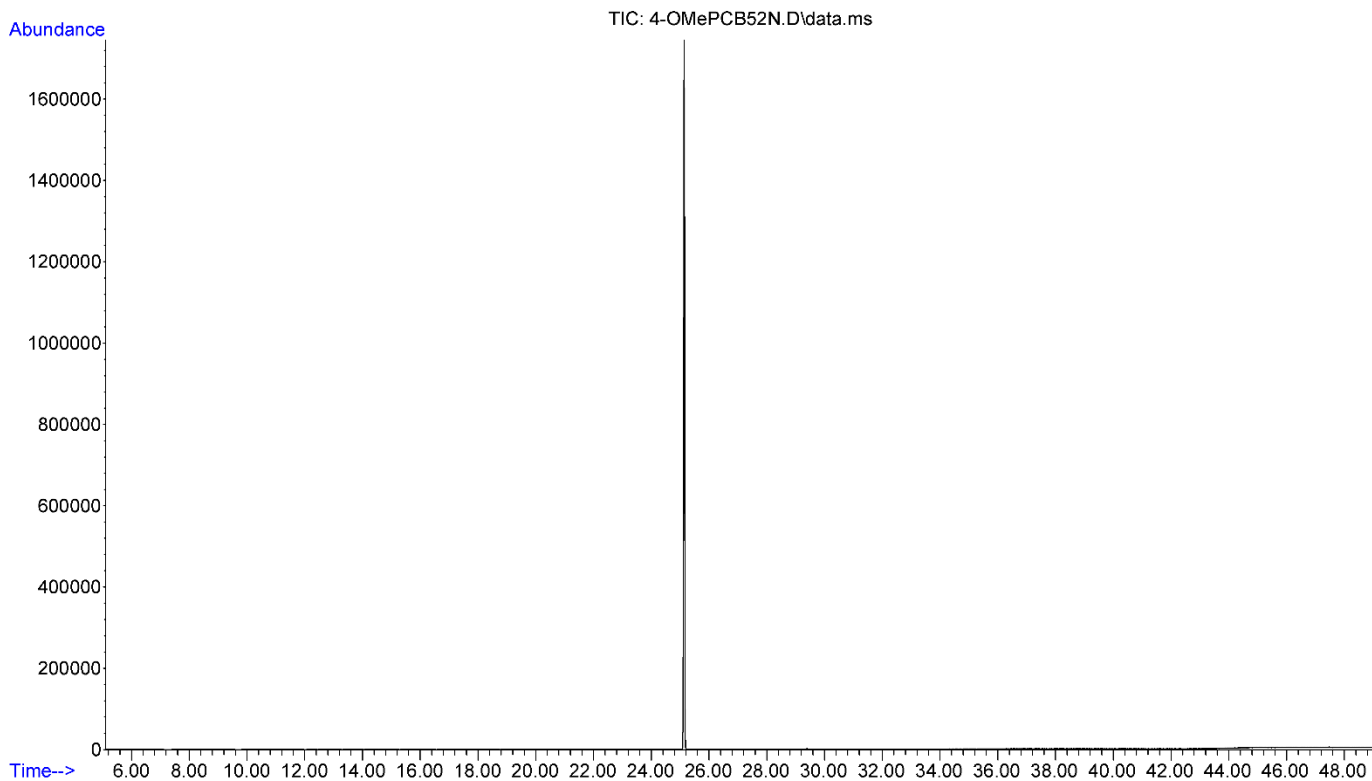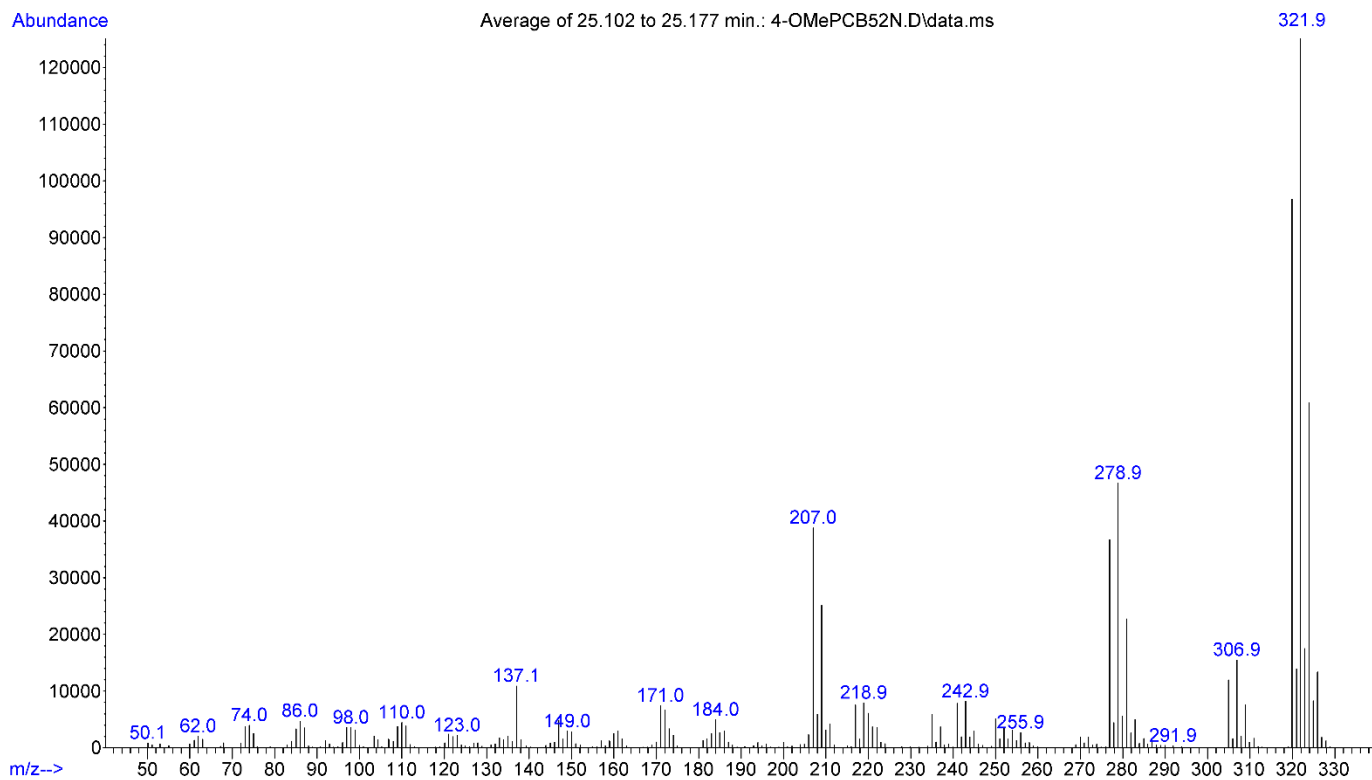

**Fig. S13.** Gas chromatogram and mass spectrum of 4-methoxy-2,2',5,5'-tetrachlorobiphenyl (4-OMe PCB 52).

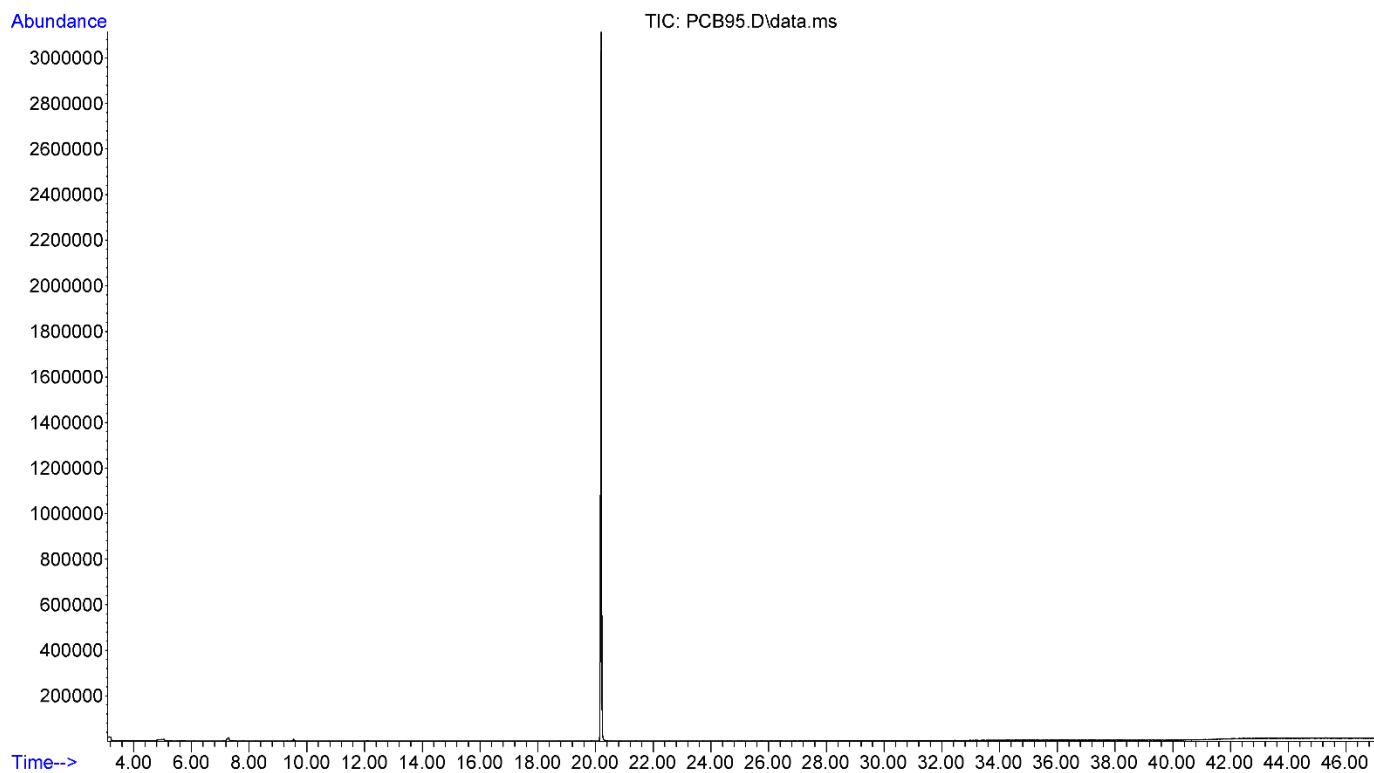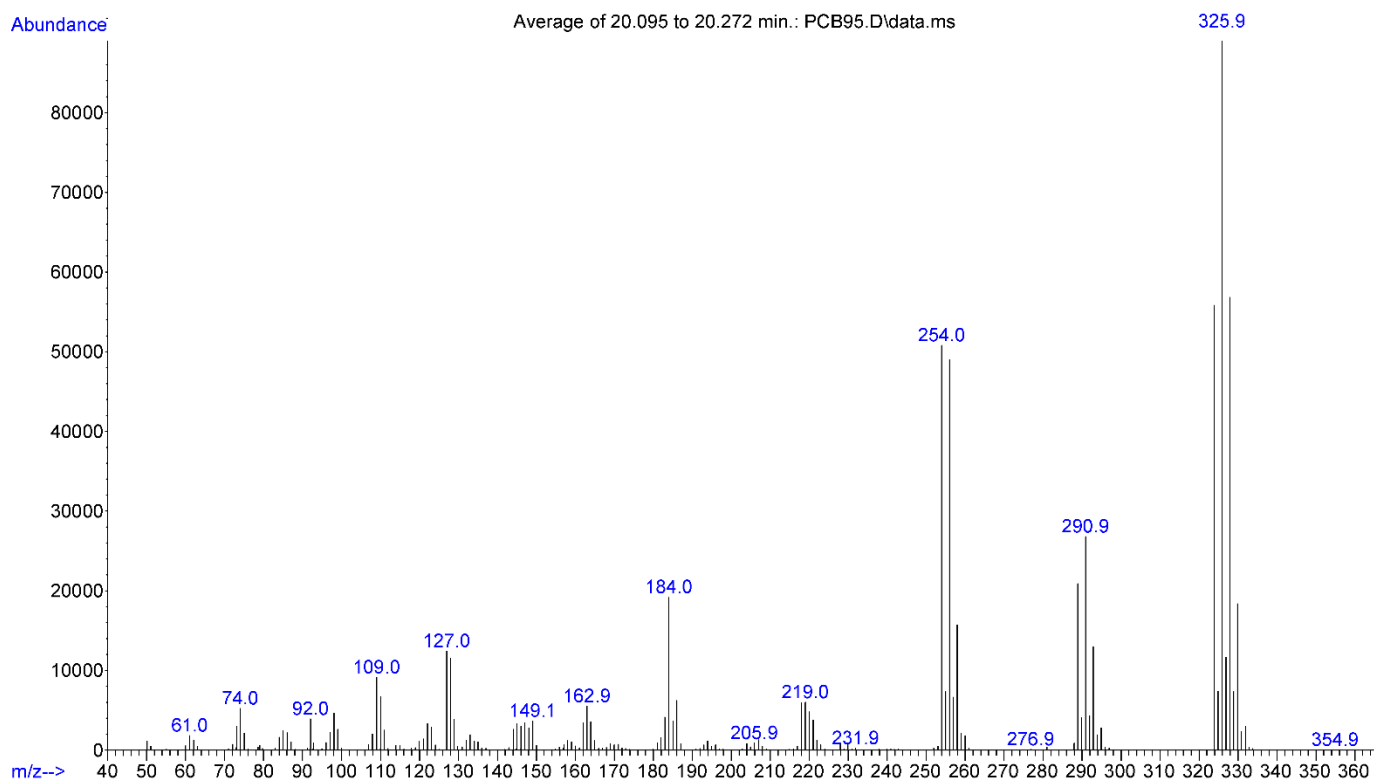

**Fig. S14.** Gas chromatogram and mass spectrum of 2,2',3,5',6-pentachlorobiphenyl (PCB 95).

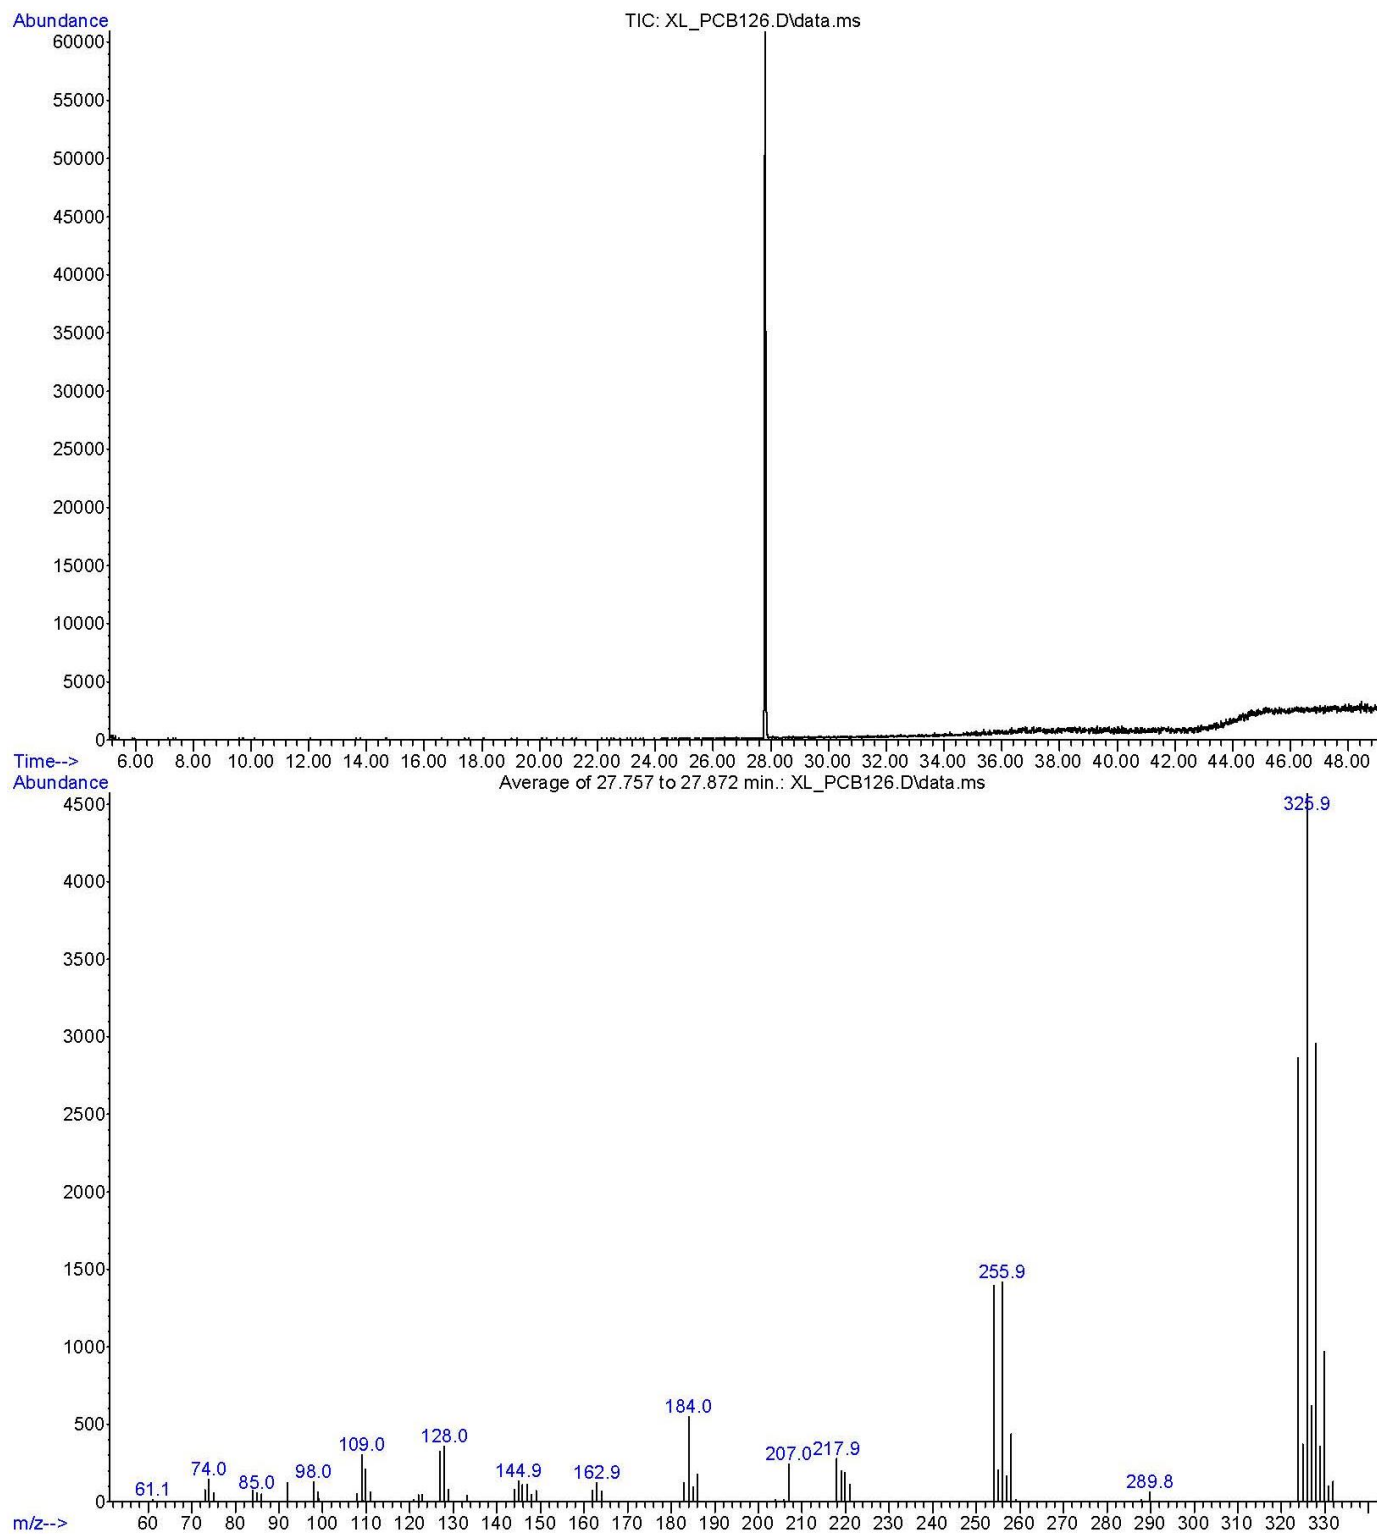

**Fig. S15.** Gas chromatogram and mass spectrum of 3,3',4,4',5-pentachlorobiphenyl (PCB 126).

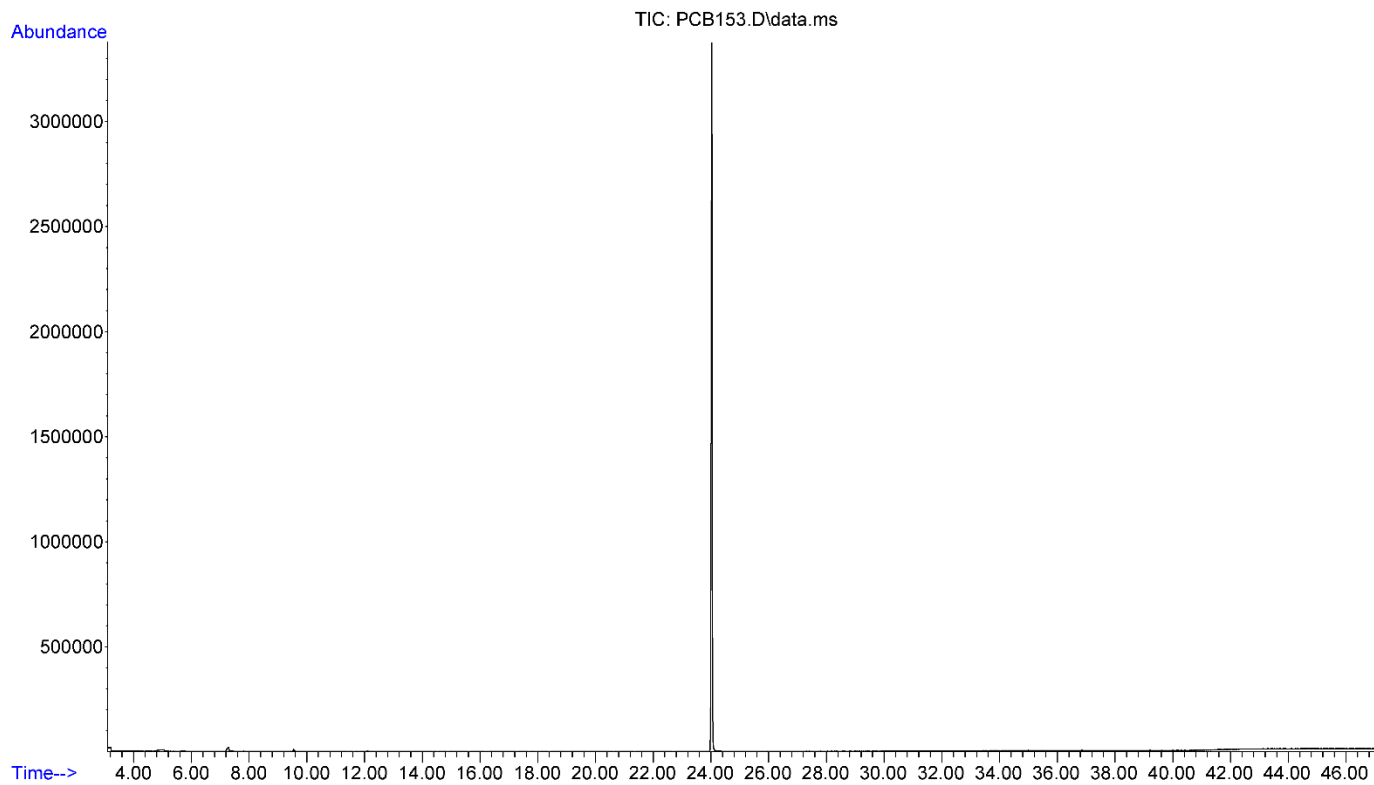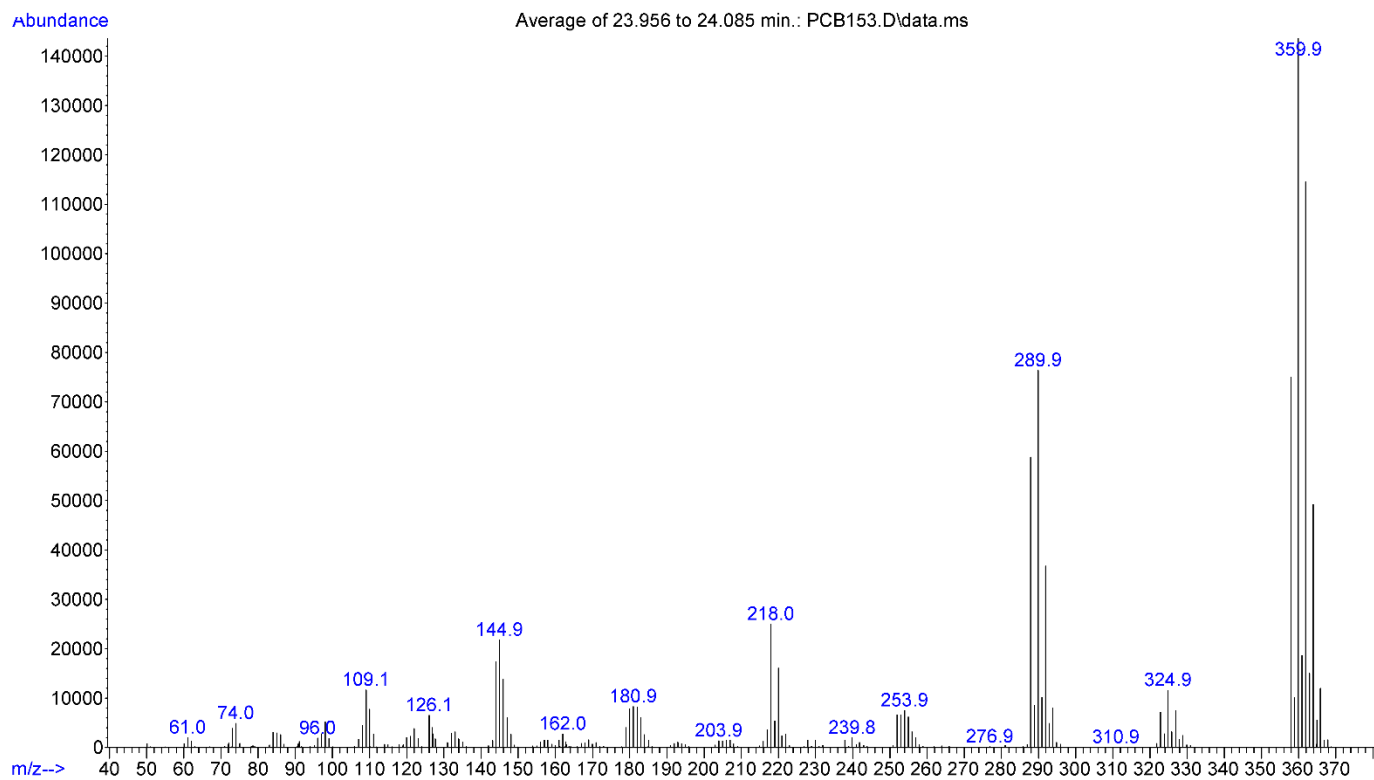

**Fig. S16.** Gas chromatogram and mass spectrum of 2,2',4,4',5,5'-hexachlorobiphenyl (PCB 153).

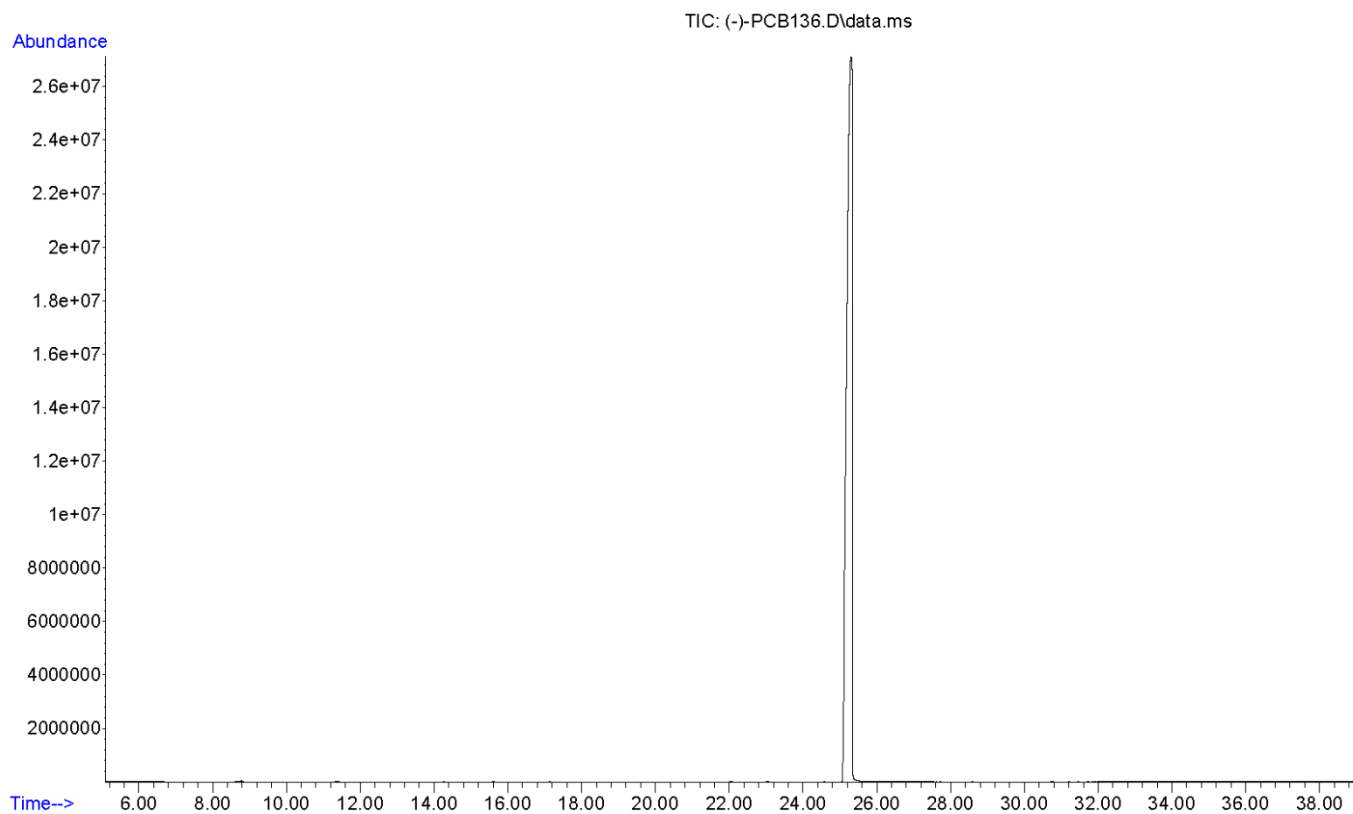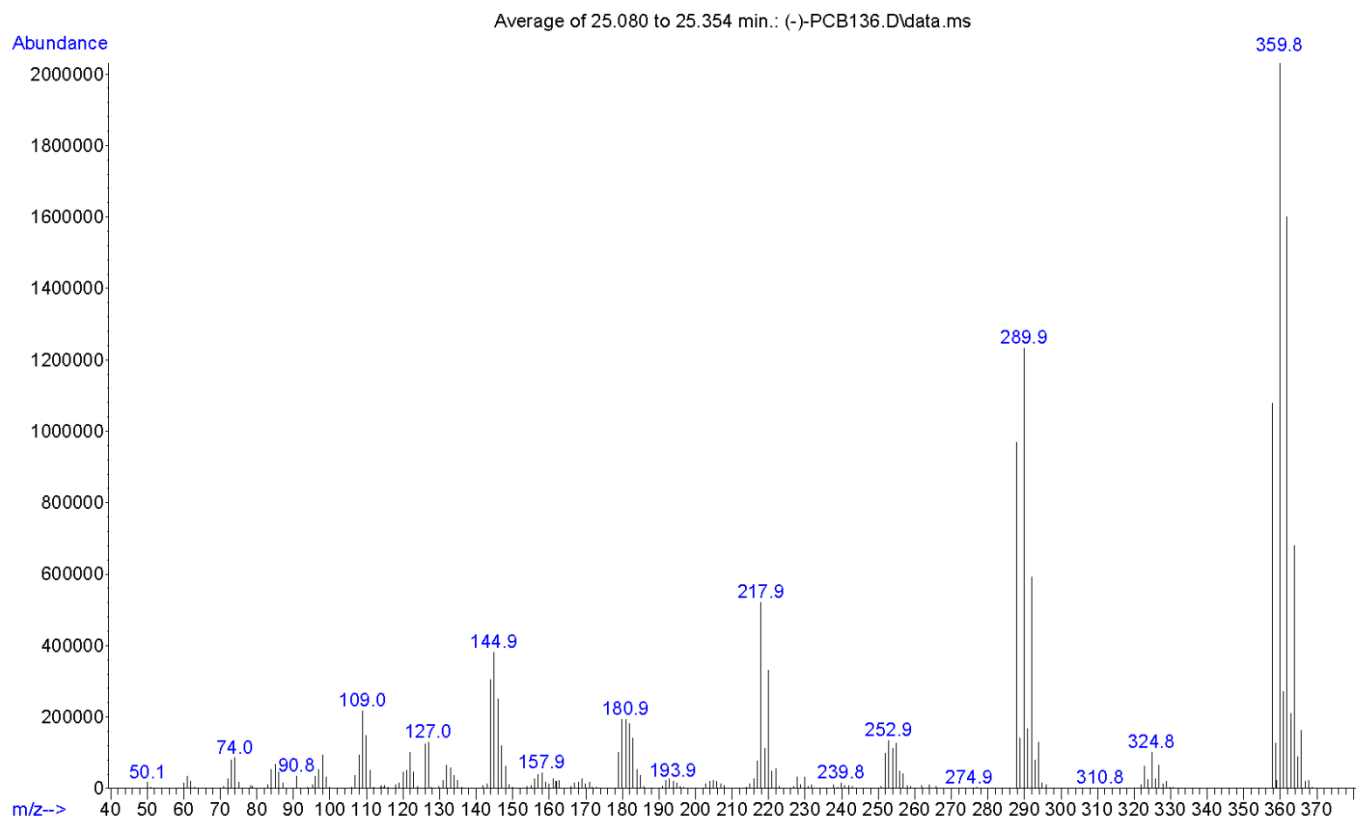

**Fig. S17.** Gas chromatogram and mass spectrum of (-)-2,2',3,3',6,6'-hexachlorobiphenyl ((-)-PCB 136).

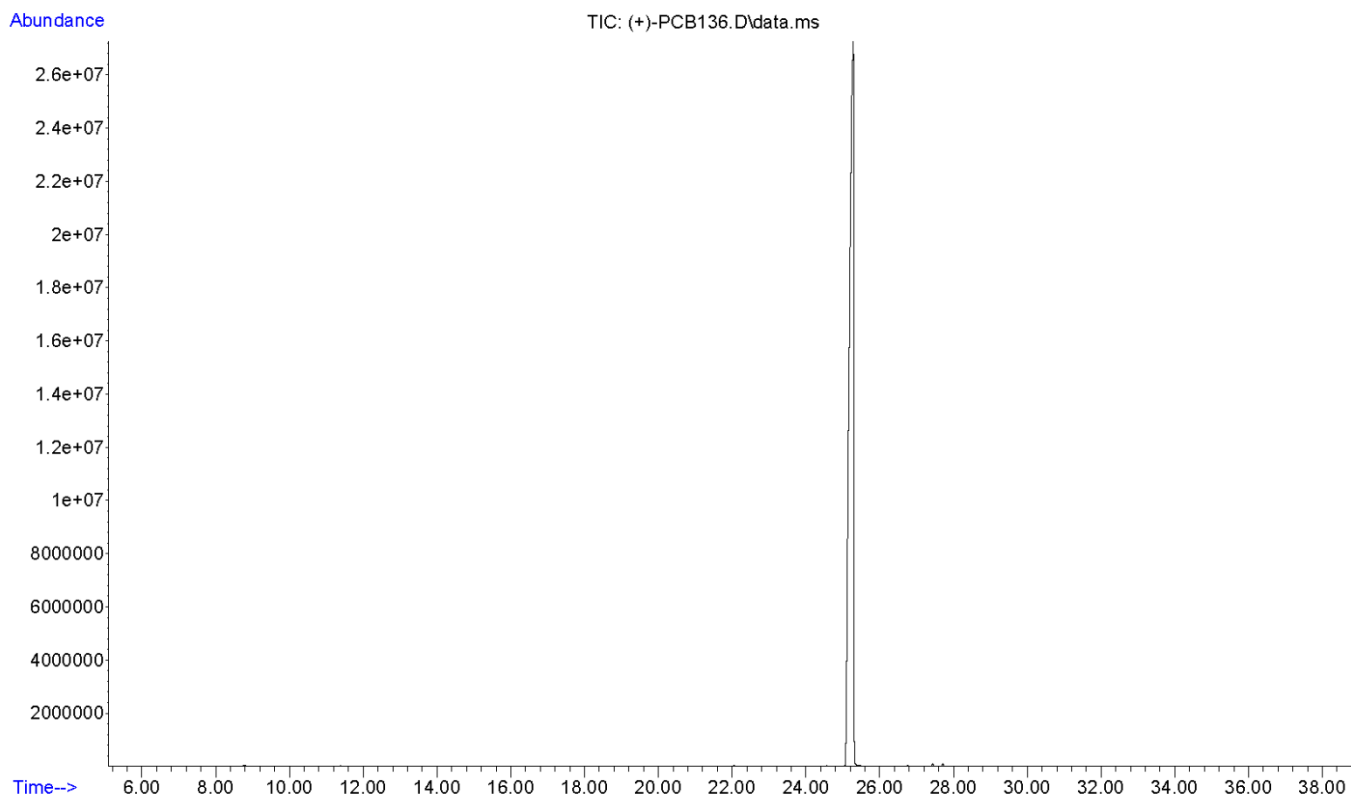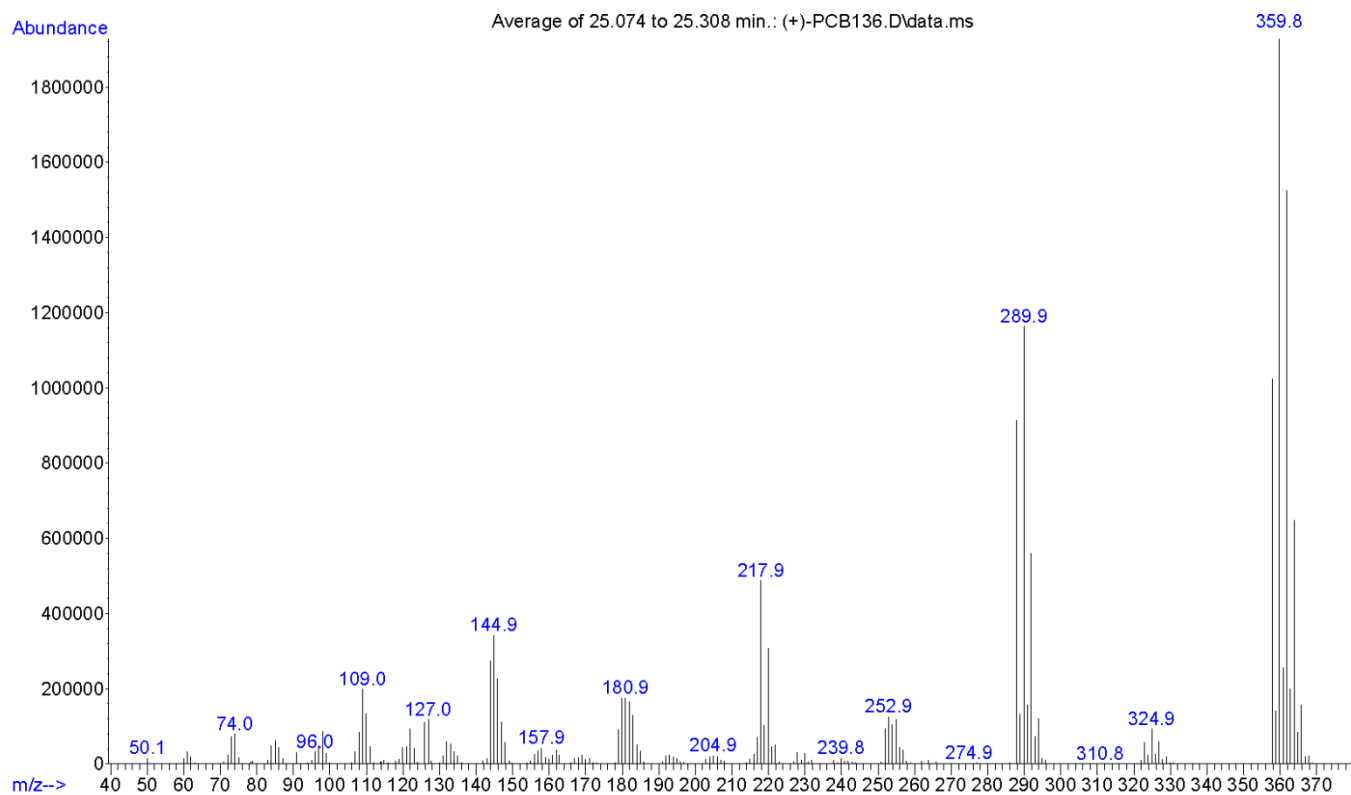

**Fig. S18.** Gas chromatogram and mass spectrum of (+)-2,2',3,3',6,6'-hexachlorobiphenyl ((+)-PCB 136)).

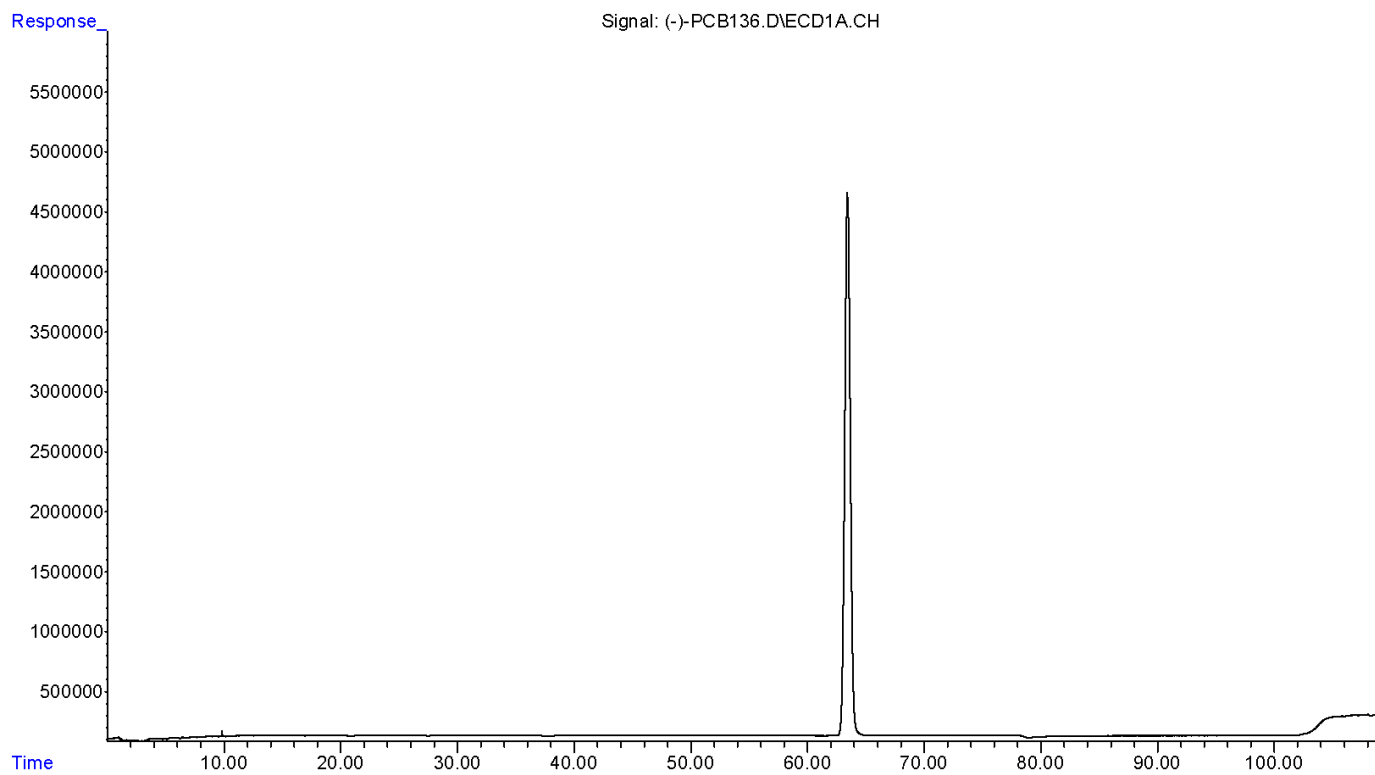

**Fig. S19.** Chromatogram of (-)-PCB 136 on enantioselective column.



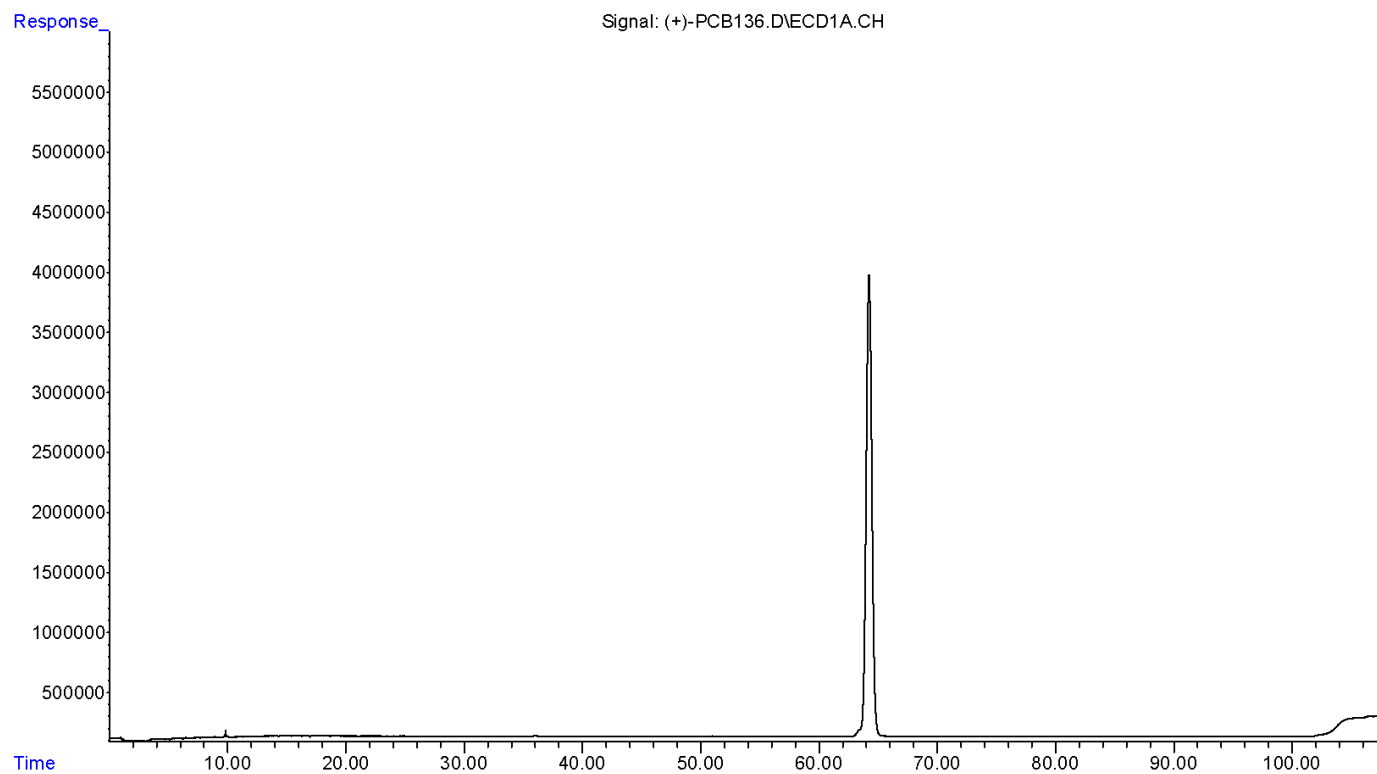

**Fig. S20.** Chromatogram of (+)-PCB 136 on enantioselective column.

## References:

- Alam S, Carter GS, Krager KJ, Li XS, Lehmler HJ, Aykin-Burns N. 2018. Pcb11 metabolite, 3,3'-dichlorobiphenyl-4-ol, exposure alters the expression of genes governing fatty acid metabolism in the absence of functional sirtuin 3: Examining the contribution of mnsod. *Antioxidants-Basel* 7.
- Dhakal K, Uwimana E, Adamcakova-Dodd A, Thorne PS, Lehmler HJ, Robertson LW. 2014. Disposition of phenolic and sulfated metabolites after inhalation exposure to 4-chlorobiphenyl (pcb3) in female rats. *Chem Res Toxicol* 27:1411-1420.
- Espandiar P, Glauert HP, Lehmler HJ, Lee EY, Srinivasan C, Robertson LW. 2004. Initiating activity of 4-chlorobiphenyl metabolites in the resistant hepatocyte model. *Toxicol Sci* 79:41-46.
- Gadupudi GS, Elser BA, Sandgruber FA, Li X, Gibson-Corley KN, Robertson LW. 2018. Pcb126 inhibits the activation of ampk-creb signal transduction required for energy sensing in liver. *Toxicol Sci* 163:440-453.
- Holland E, Feng W, Zheng J, Dong Y, Li X, Lehmler H-J, et al. 2017. An extended structure-activity relationship of non-dioxin like pcbs validates and supports modeling predictions and identifies picomolar potency of pcb 202 towards ryanodine receptors. *Toxicol Sci* 155:170-181.
- Joshi SN, Vyas SM, Duffel MW, Parkin S, Lehmler HJ. 2011. Synthesis of sterically hindered polychlorinated biphenyl derivatives. *Synthesis*:1045-1054.
- Kania-Korwel I, Parkin S, Robertson LW, Lehmler HJ. 2004. Synthesis of polychlorinated biphenyls and their metabolites with a modified suzuki-coupling. *Chemosphere* 56:735-744.
- Kania-Korwel I, Hrycay EG, Bandiera SM, Lehmler HJ. 2008. 2,2',3,3',6,6'-hexachlorobiphenyl (pcb 136) atropisomers interact enantioselectively with hepatic microsomal cytochrome p450 enzymes. *Chem Res Toxicol* 21:1295-1303.
- Lehmler HJ, Robertson LW. 2001. Synthesis of hydroxylated pcb metabolites with the suzuki-coupling. *Chemosphere* 45:1119-1127.
- Li X, Parkin S, Duffel M, Robertson LW, Lehmler HJ. 2010. An efficient approach to sulfate metabolites of polychlorinated biphenyls. *Environ Int* 36:843-848.
- Li X, Holland EB, Feng W, Zheng J, Dong Y, Pessah IN, et al. 2018. Authentication of synthetic environmental contaminants and their (bio)transformation products in toxicology: Polychlorinated biphenyls as an example. *Environ Sci Pollut Res* 25:16508-16521.
- McLean MR, Bauer U, Amaro AR, Robertson LW. 1996. Identification of catechol and hydroquinone metabolites of 4-monochlorobiphenyl. *Chem Res Toxicol* 9:158-164.
- Rodriguez EA, Li X, Lehmler HJ, Robertson LW, Duffel MW. 2016. Sulfation of lower chlorinated polychlorinated biphenyls increases their affinity for the major drug-binding sites of human serum albumin. *Environ Sci Technol* 50:5320-5327.
- Sethi S, Morgan KR, Feng W, Lin YP, Li X, Luna C, et al. 2019. Comparative analyses of the 12 most abundant pcb congeners detected in human maternal serum for activity at the thyroid hormone receptor and ryanodine receptor. *Environ Sci Technol ASAP*.
- Shaikh NS, Parkin S, Lehmler HJ. 2006. The ullmann coupling reaction: A new approach to tetraarylstannanes. *Organometallics* 25:4207-4214.
- Song Y, Buettner GR, Parkin S, Wagner BA, Robertson LW, Lehmler HJ. 2008. Chlorination increases the persistence of semiquinone free radicals derived from polychlorinated biphenyl hydroquinones and quinones. *J Org Chem* 73:8296-8304.
- Wu X, Kania-Korwel I, Chen H, Stamou M, Dammanahalli KJ, Duffel M, et al. 2013. Metabolism of 2,2',3,3',6,6'-hexachlorobiphenyl (pcb 136) atropisomers in tissue slices from phenobarbital or dexamethasone-induced rats is sex-dependent. *Xenobiotica* 43:933-947.
