# Supplementary material
Source: PubMed Central journal article supplement (PMC7377239)
Supplement: ehp7030.smcontents.508.pdf [file ehp7030.smcontents.508.pdf]

**Note to readers with disabilities:** *EHP* strives to ensure that all journal content is accessible to all readers. However, some figures and Supplemental Material published in *EHP* articles may not conform to [508 standards](#) due to the complexity of the information being presented. If you need assistance accessing journal content, please contact [ehp508@niehs.nih.gov](mailto:ehp508@niehs.nih.gov). Our staff will work with you to assess and meet your accessibility needs within 3 working days.

### **Supplemental Material**

#### **Cardiovascular Effects of Polychlorinated Biphenyls and Their Major Metabolites**

Fabian A. Grimm, William D. Klaren, Xueshu Li, Hans-Joachim Lehmler, Moumita Karmakar, Larry W. Robertson, Weihsueh A. Chiu, and Ivan Rusyn

#### **Table of Contents**

**Table S1.** Chemical names, abbreviations and references describing the synthesis and authentication of the PCB derivatives used in this study.

**Table S2.** Data files for all cell types and phenotypes used in this study (Supplemental Excel File).

**Text S1.** Purity determination by GC-MS.

**Text S2.** Enantiomeric purity determination.

**Figure S1.** Gas chromatogram and mass spectrum of 4-chlorobiphenyl (PCB 3).

**Figure S2.** Gas chromatogram and mass spectrum of 4-chlorobiphenyl-2'-ol (2'-OH PCB 3).

**Figure S3.** Gas chromatogram and mass spectrum of 4-chlorobiphenyl-3'-ol (3'-OH PCB 3).

**Figure S4.** Gas chromatogram and mass spectrum of 4-chlorobiphenyl-4'-ol (4'-OH PCB 3).

**Figure S5.** Gas chromatogram and mass spectrum of 4'-Methoxy-4-chlorobiphenyl (4'-OMe PCB 3).

**Figure S6.** Gas chromatogram and mass spectrum of 2-(4-chlorophenyl)benzo-2,5-quinone (4-Cl BQ).

**Figure S7.** Gas chromatogram and mass spectrum of 3,3'-dichlorobiphenyl (PCB 11).

**Figure S8.** Gas chromatogram and mass spectrum of 3,3'-dichlorobiphenyl-4-ol (4-OH PCB 11).

**Figure S9.** Gas chromatogram and mass spectrum of 3,3'-dichlorobiphenyl-5-ol (5-OH PCB 11).

**Figure S10.** Gas chromatogram and mass spectrum of 4-methoxy-3,3'-dichlorobiphenyl (4-OMe PCB 11).

**Figure S11.** Gas chromatogram and mass spectrum of Gas chromatogram and mass spectrum of 2,2',5,5'-tetrachlorobiphenyl (PCB 52).

**Figure S12.** Gas chromatogram and mass spectrum of 2,2',5,5'-tetrachlorobiphenyl-4-ol (4-OH PCB 52).

**Figure S13.** Gas chromatogram and mass spectrum of 4-methoxy-2,2',5,5'-tetrachlorobiphenyl (4-OMe PCB 52).

**Figure S14.** Gas chromatogram and mass spectrum of 2,2',3,5',6-pentachlorobiphenyl (PCB 95).

**Figure S15.** Gas chromatogram and mass spectrum of 3,3',4,4',5-pentachlorobiphenyl (PCB 126).

**Figure S16.** Gas chromatogram and mass spectrum of 2,2',4,4',5,5'-hexachlorobiphenyl (PCB 153).

**Figure S17.** Gas chromatogram and mass spectrum of (-)-2,2',3, 3',6,6'-hexachlorobiphenyl ((-)-PCB 136).

**Figure S18.** Gas chromatogram and mass spectrum of (+)-2,2',3, 3',6,6'-hexachlorobiphenyl ((+)-PCB 136).

**Figure S19.** Chromatogram of (-)-PCB 136 on enantioselective column.

**Figure S20.** Chromatogram of (+)-PCB 136 on enantioselective column.

## References

**Additional File-** Excel Document
